# Supplementary material for: An efficient green chemistry protocol for the synthesis of novel spiropyrrolizidine compounds
Source: Royal Society of Chemistry journal article supplement (doi:10.1039/c3ra44627a), 2013-11-07
Supplement: c3ra44627a.pdf [file c3ra44627a.pdf]

## An efficient green chemistry protocol for the synthesis of novel spiropyrrolizidine compounds

Krishnan Revathy, Appaswami Lalitha \*

Department of Chemistry, Periyar University, Salem-636011, Tamil Nadu, India.

\*Fax: +91 427 2345766; Tel: +91 427 2345271; E-mail: lalitha2531@yahoo.co.in

### Supplementary data

| Contents                                                                | Page No. |
|-------------------------------------------------------------------------|----------|
| 1. General remarks                                                      | 3        |
| 2. <sup>1</sup> H NMR Spectrum of <b>6b</b>                             | 4        |
| 3. <sup>13</sup> C NMR Spectrum of <b>6b</b>                            | 5        |
| 4. <sup>1</sup> H NMR Spectrum of <b>6d</b>                             | 6        |
| 5. <sup>13</sup> C NMR Spectrum of <b>6d</b>                            | 7        |
| 6. <sup>13</sup> C NMR Spectrum of <b>6e</b>                            | 8        |
| 7. <sup>13</sup> C NMR Spectrum of <b>6f</b>                            | 9        |
| 8. <sup>13</sup> C NMR Spectrum of <b>6g</b>                            | 10       |
| 9. <sup>1</sup> H NMR Spectrum of <b>6h</b>                             | 11       |
| 10. <sup>13</sup> C NMR Spectrum of <b>6h</b>                           | 12       |
| 11. <sup>1</sup> H NMR Spectrum of <b>6i</b>                            | 13       |
| 12. <sup>13</sup> C NMR Spectrum of <b>6i</b>                           | 14       |
| 13. <sup>1</sup> H NMR Spectrum of <b>6j</b>                            | 15       |
| 14. <sup>1</sup> H NMR Spectrum of <b>8a</b>                            | 16       |
| 15. <sup>13</sup> C NMR Spectrum of <b>8a</b>                           | 17       |
| 16. DEPT <sup>13</sup> C NMR Spectrum of <b>8a</b>                      | 18       |
| 17. <sup>1</sup> H NMR Spectrum of <b>10a</b>                           | 19       |
| 18. <sup>13</sup> C NMR Spectrum of <b>10a</b>                          | 20       |
| 19. <sup>1</sup> H NMR Spectrum of <b>10b</b>                           | 21       |
| 20. <sup>13</sup> C NMR Spectrum of <b>10b</b>                          | 22       |
| 21. <sup>1</sup> H NMR Spectrum of <b>10c</b>                           | 23       |
| 22. <sup>13</sup> C NMR Spectrum of <b>10c</b>                          | 24       |
| 23. <sup>1</sup> H NMR Spectrum of <b>10d</b>                           | 25       |
| 24. <sup>13</sup> C NMR Spectrum of <b>10d</b>                          | 26       |
| 25. <sup>1</sup> H NMR Spectrum of <b>10e</b>                           | 27       |
| 26. <sup>13</sup> C NMR Spectrum of <b>10e</b>                          | 28       |
| 27. <sup>1</sup> H NMR Spectrum of <b>10f</b>                           | 29       |
| 28. <sup>13</sup> C NMR Spectrum of <b>10f</b>                          | 30       |
| 29. <sup>1</sup> H- <sup>1</sup> H COSY spectrum of <b>6b</b>           | 31       |
| 30. Expanded <sup>1</sup> H- <sup>1</sup> H COSY spectrum of <b>6b</b>  | 32       |
| 31. Expanded <sup>1</sup> H- <sup>1</sup> H COSY spectrum of <b>6b</b>  | 33       |
| 32. <sup>1</sup> H- <sup>13</sup> C COSY spectrum of <b>6b</b>          | 34       |
| 33. Expanded <sup>1</sup> H- <sup>13</sup> C COSY spectrum of <b>6b</b> | 35       |
| 34. Expanded <sup>1</sup> H- <sup>13</sup> C COSY spectrum of <b>6b</b> | 36       |
| 35. <sup>1</sup> H- <sup>1</sup> H COSY spectrum of <b>10d</b>          | 37       |
| 36. Expanded <sup>1</sup> H- <sup>1</sup> H COSY spectrum of <b>10d</b> | 38       |

|                                                                         |    |
|-------------------------------------------------------------------------|----|
| 37. Expanded $^1\text{H}$ - $^1\text{H}$ COSY spectrum of <b>10d</b>    | 39 |
| 38. $^1\text{H}$ - $^{13}\text{C}$ COSY spectrum of <b>10d</b>          | 40 |
| 39. Expanded $^1\text{H}$ - $^{13}\text{C}$ COSY spectrum of <b>10d</b> | 41 |
| 40. Expanded $^1\text{H}$ - $^{13}\text{C}$ COSY spectrum of <b>10d</b> | 42 |
| 41. $^1\text{H}$ NMR Spectrum of <b>6B</b>                              | 43 |
| 42. $^{13}\text{C}$ NMR Spectrum of <b>6B</b>                           | 44 |
| 43. DEPT $^{13}\text{C}$ NMR Spectrum of <b>6B</b>                      | 45 |
| 44. ORTEP diagram of <b>6b</b>                                          | 46 |
| 45. ORTEP diagram of <b>6n</b>                                          | 47 |

## General remarks

Chalcones have been prepared by the condensation of ketones with aldehydes in mild basic medium at cold conditions. Isatin, acenaphthenequinone, L-Proline and L-Thiaproline were purchased from Sigma-Aldrich and were used as such without further purification. The melting points of all compounds were determined on Guna apparatus using capillary tube and are uncorrected. The purities of the compounds were checked by TLC using precoated silica gel plates with n-hexane:ethyl acetate (6:4) as eluent.  $^1\text{H}$ ,  $^{13}\text{C}$  and 2D NMR spectra were recorded on a Bruker Avance spectrophotometer at 400, 100 and 500/125 respectively using TMS as reference. High Resolution Mass Spectra of representative compounds were recorded on maXis 10138 Mass spectrometer at 70 eV. Elemental microanalyses were carried out on a Perkin-Elmer elemental analyzer Model 240C and a Thermo Finnigan analyser series Flash EA1112. Single crystal X-ray diffraction was performed on a Bruker-Nonius SMART APEX CCD area detector system using graphite monochromated, Mo-K $\alpha$  ( $\lambda=0.71073$ ) radiation.

### Synthesis of spiro pyrrolizidine 6a-6n:

To the solution of 0.0005mol of isatin and 0.0005mol of L-Proline/ L-Thiaproline/ Sarcosine in 10 ml of methanol, 0.0005 mol of chalcone was added and stirred at room temperature until the completion of reaction as indicated by TLC. After the completion of reaction, solvent was removed in a rotovapor and the crystallized product was obtained in excellent yields and purity.

### Synthesis of spiro pyrrolizidine 8a and 8e:

To the solution of 0.0005mol of isatin and 0.0005mol of L-Proline in 10 ml of methanol, 0.0005 mol of chalcone was added and stirred at reflux temperature until the completion of reaction as indicated by TLC. After the completion of reaction, solvent was removed in a rotovapor and the crystallized product was obtained in excellent yields and purity.

### Synthesis of spiro pyrrolizidine 10a-10f:

To the solution of 0.0005mol of acenaphthenequinone and 0.0005mol of L-Proline/ L-Thiaproline in 10 ml of methanol, 0.0005 mol of chalcone was added and stirred at reflux temperature until the completion of reaction as indicated by TLC. After the completion of reaction, solvent was removed in a rotovapor and the crystallized product was obtained in excellent yields and purity.

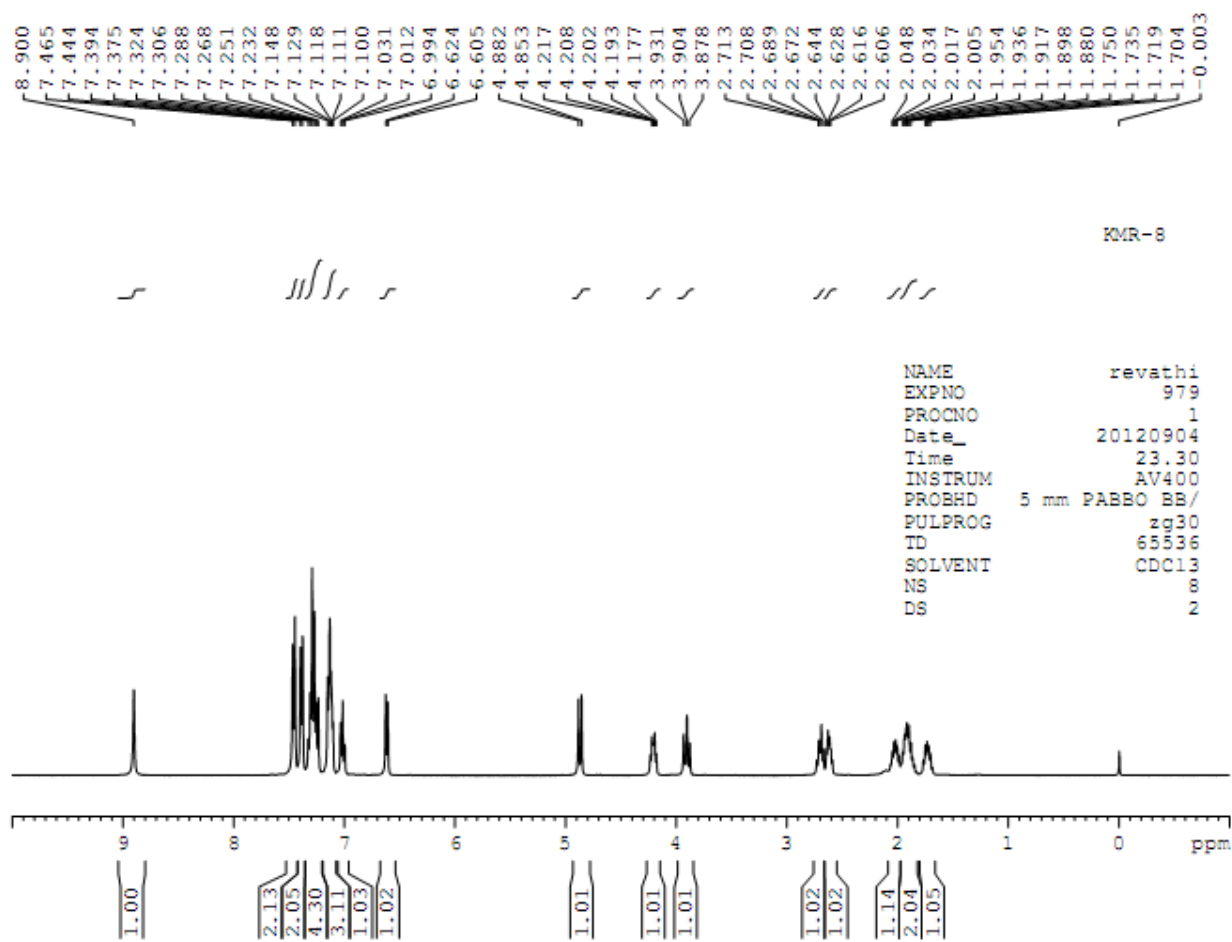

<sup>1</sup>H NMR Spectrum of **6b**

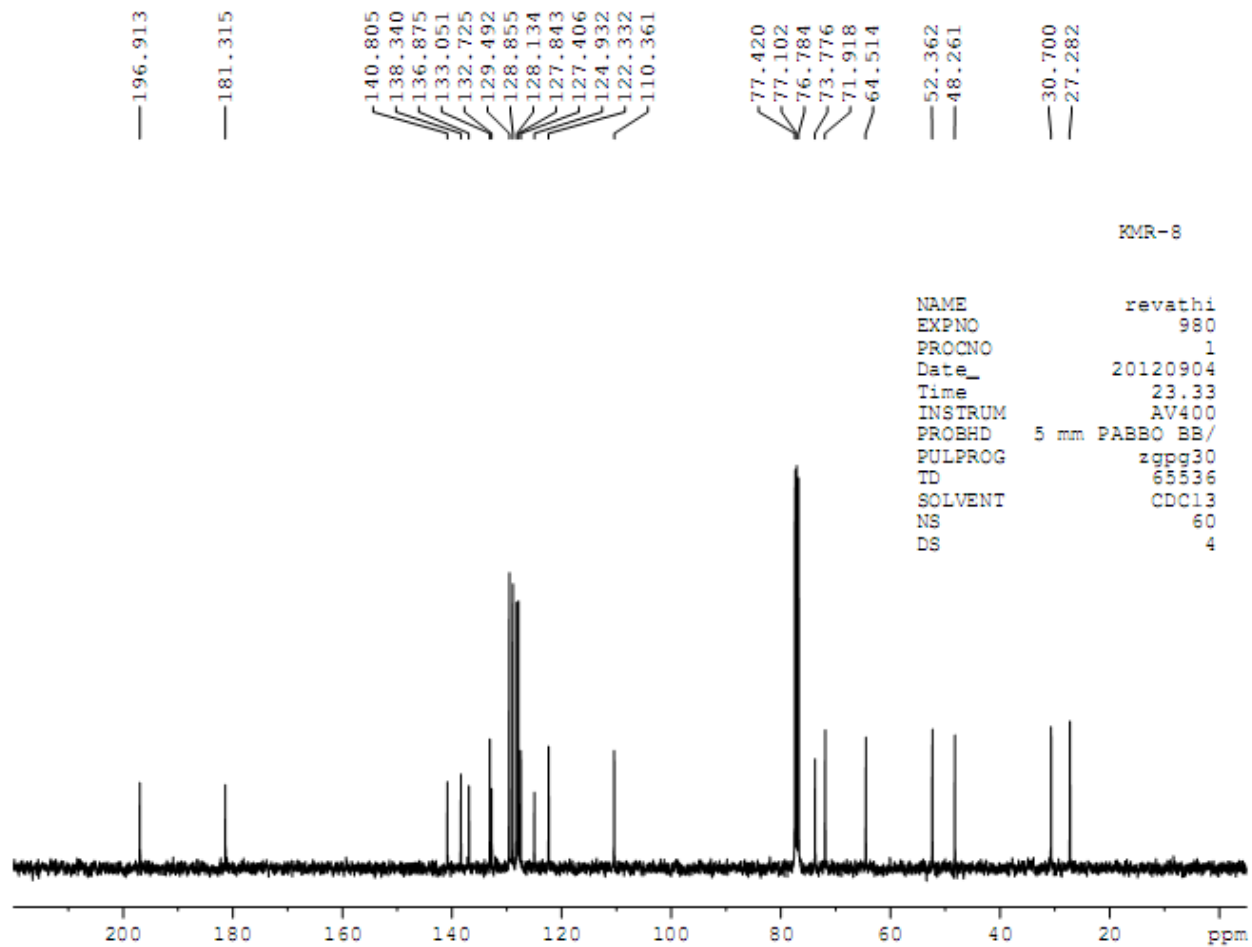

$^{13}\text{C}$  NMR Spectrum of **6b**

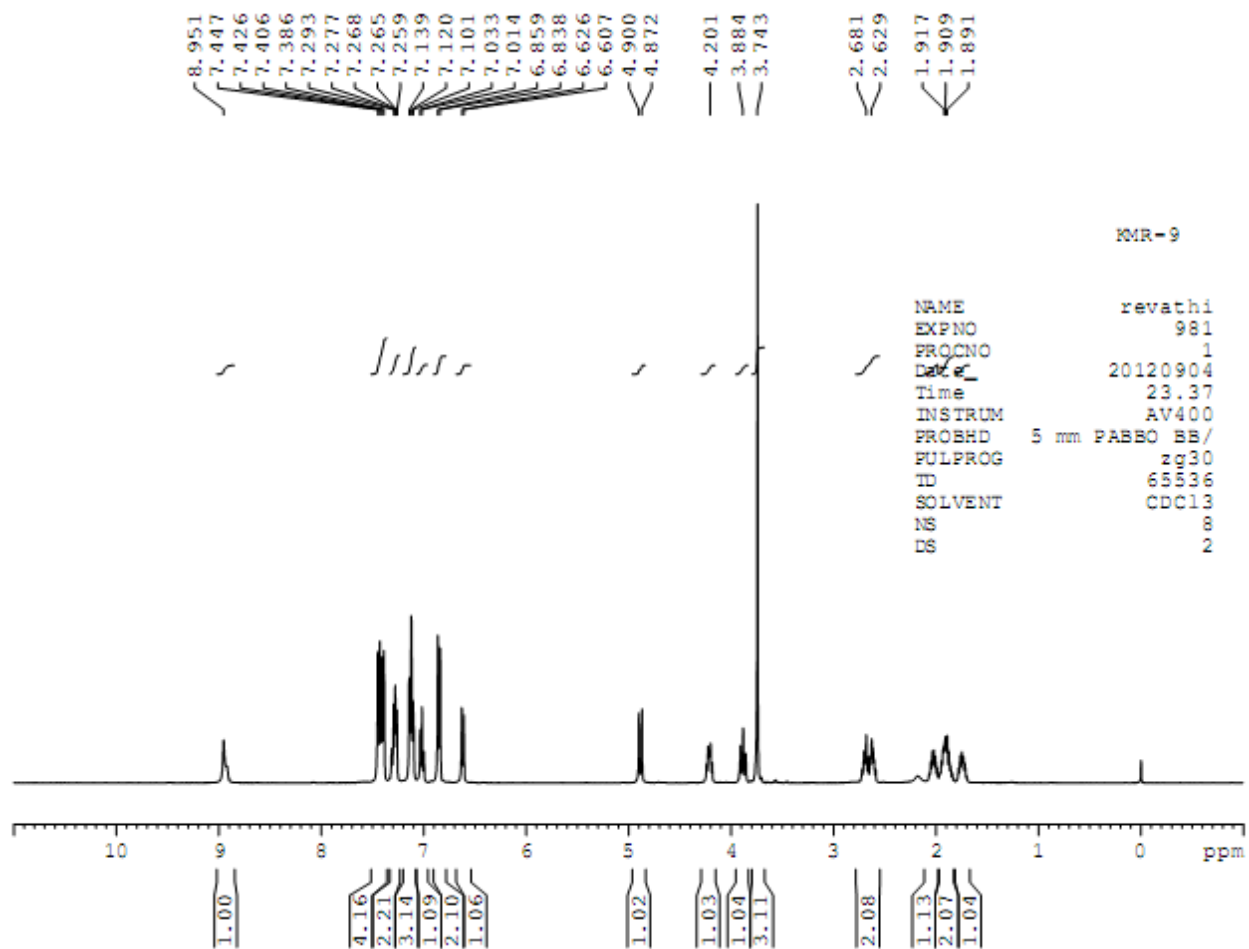

<sup>1</sup>H NMR Spectrum of **6d**

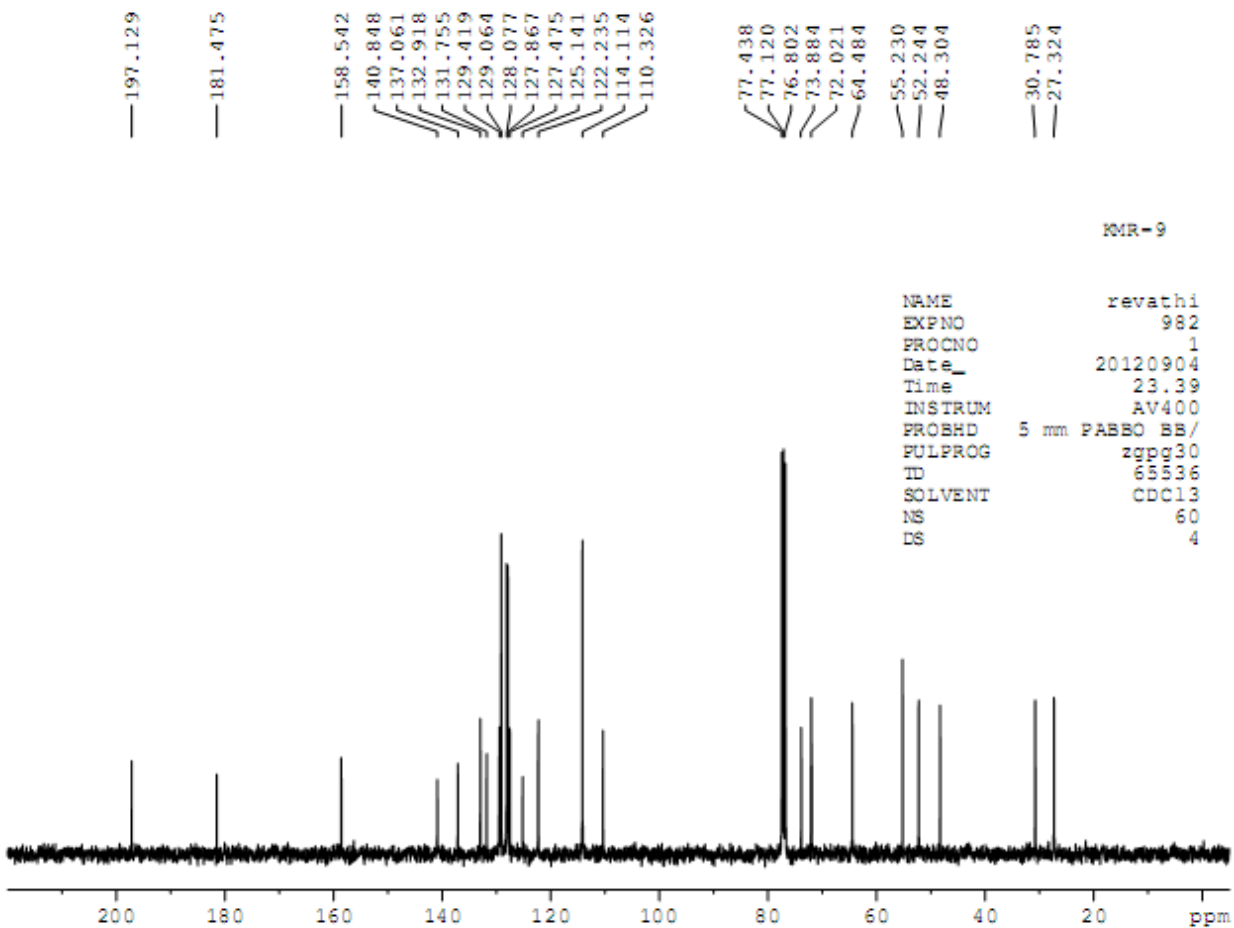

$^{13}\text{C}$  NMR Spectrum of **6d**

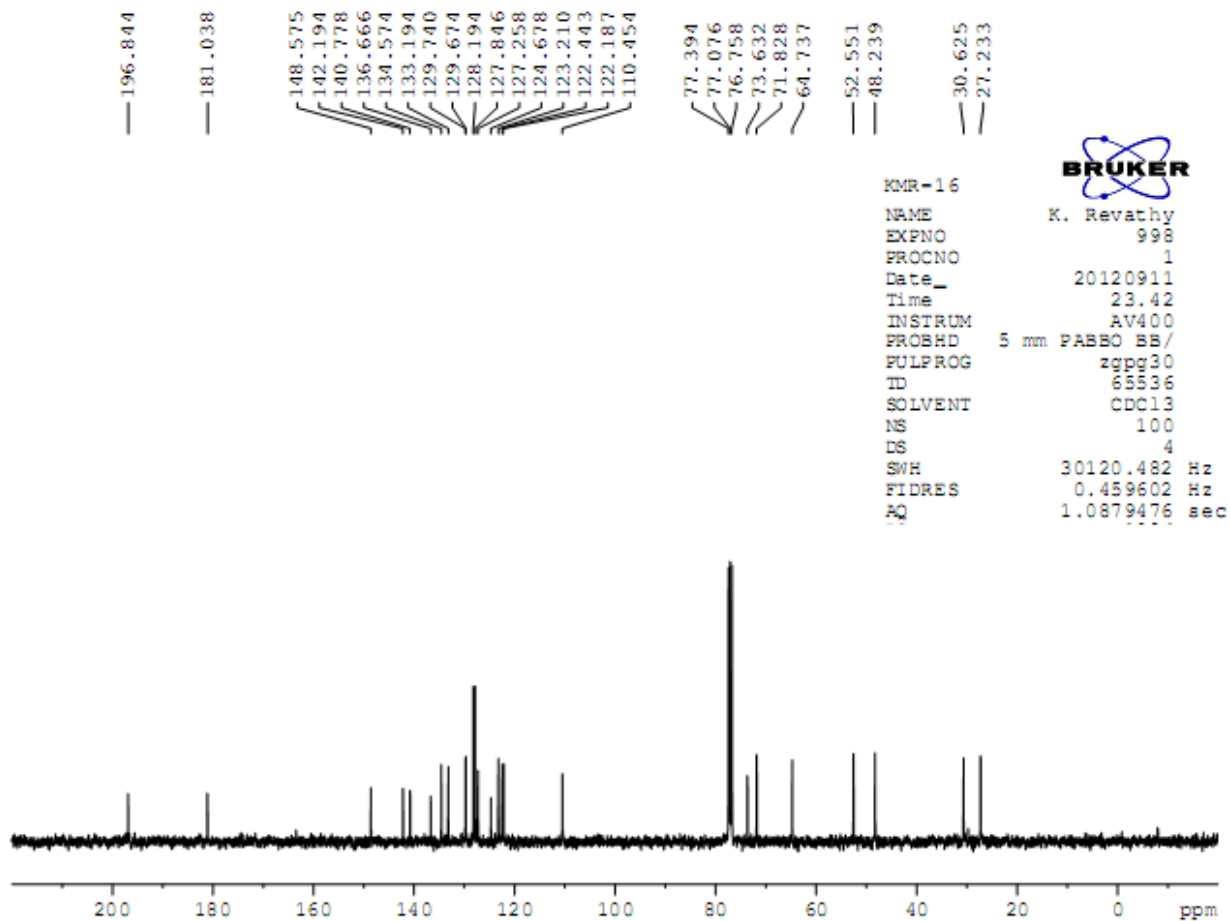

$^{13}\text{C}$  NMR Spectrum of **6e**



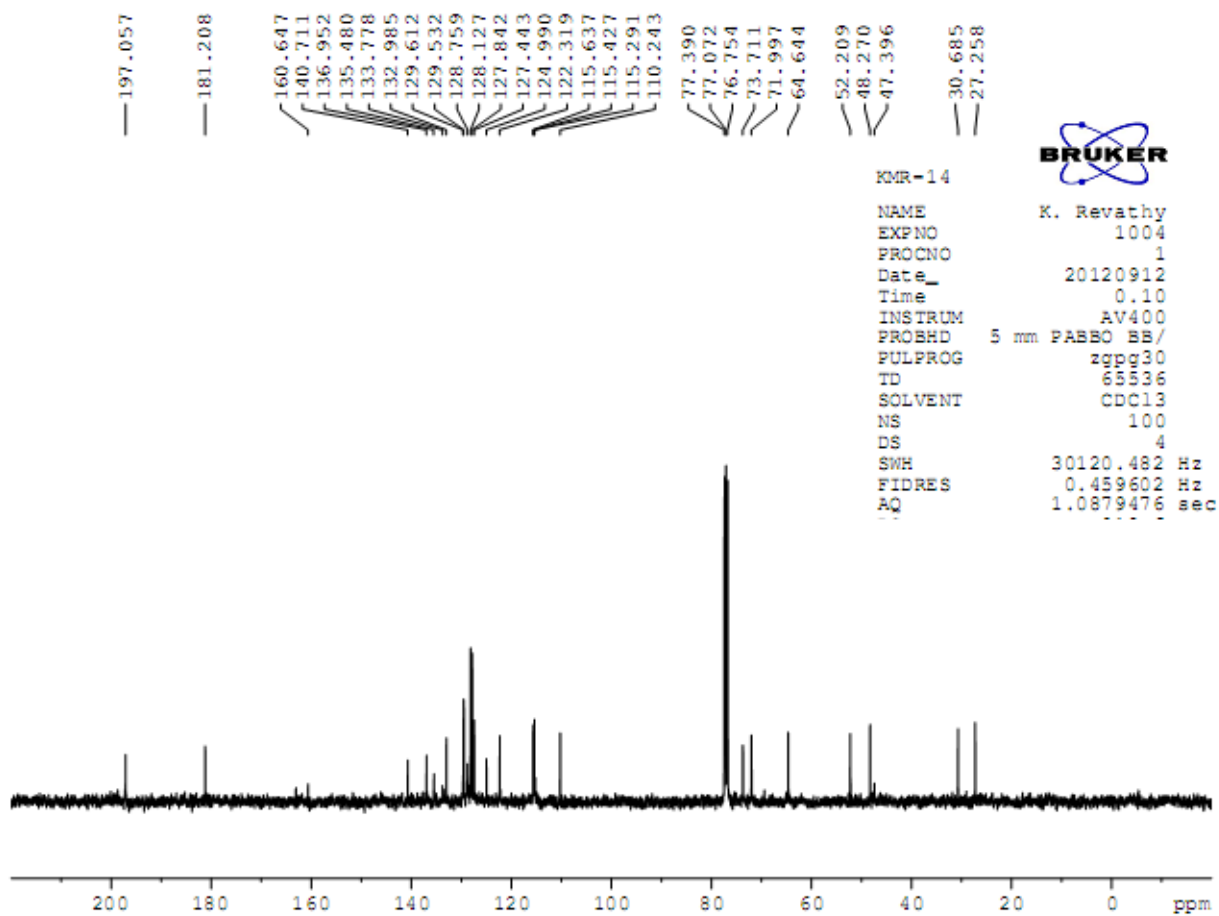

$^{13}\text{C}$  NMR Spectrum of **6f**

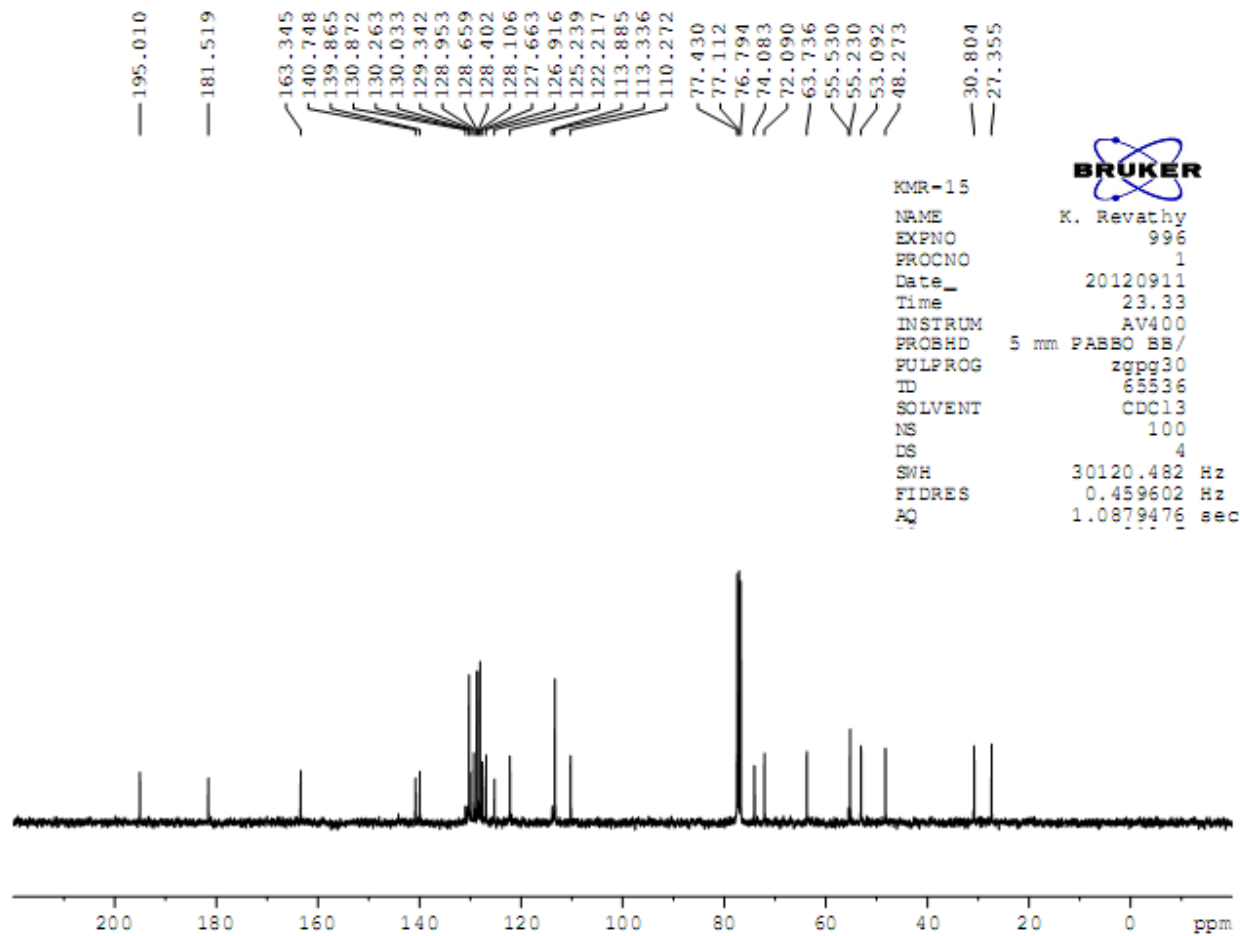

$^{13}\text{C}$  NMR Spectrum of **6g**

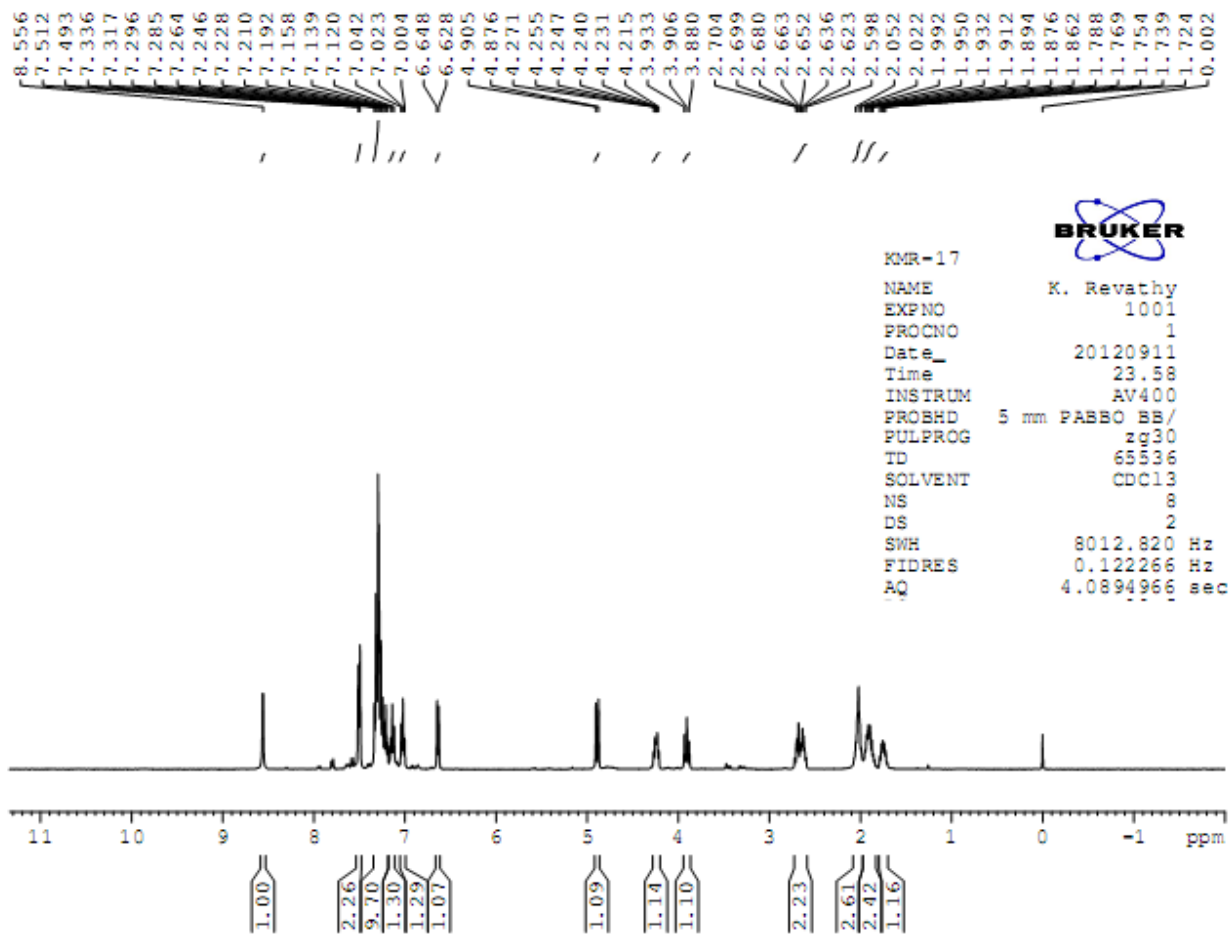

<sup>1</sup>H NMR Spectrum of **6h**

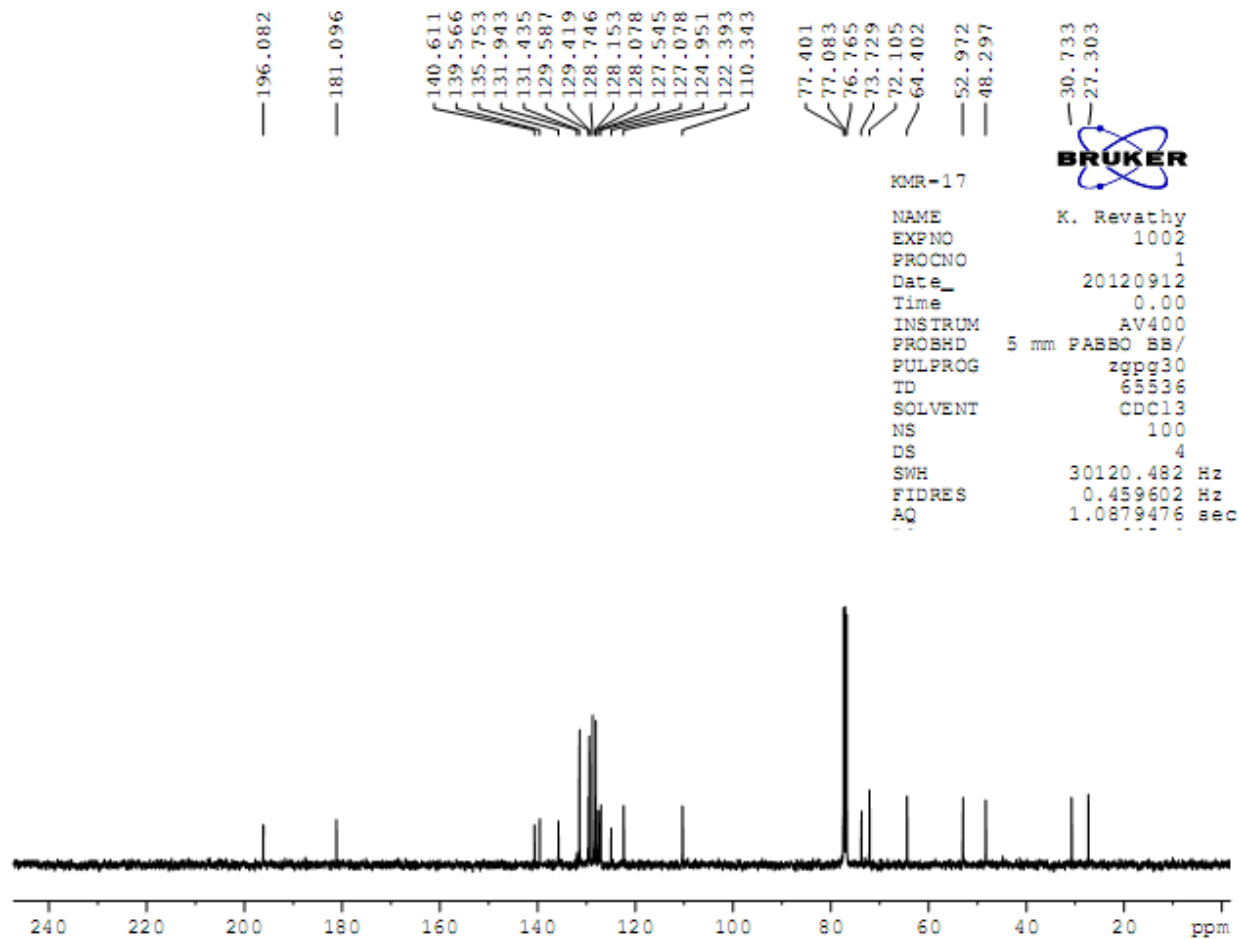

$^{13}\text{C}$  NMR Spectrum of **6h**

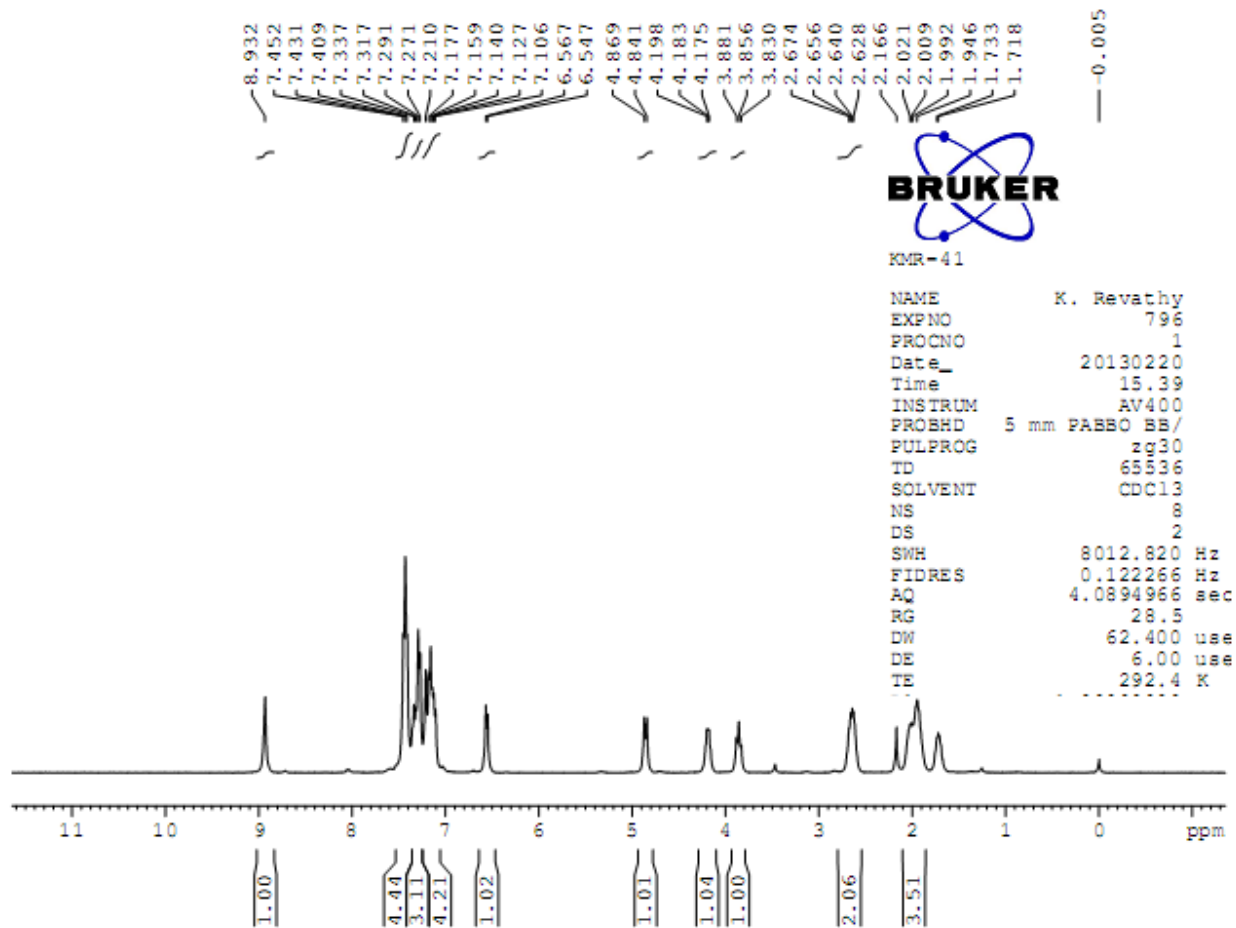

$^1\text{H}$  NMR Spectrum of **6i**

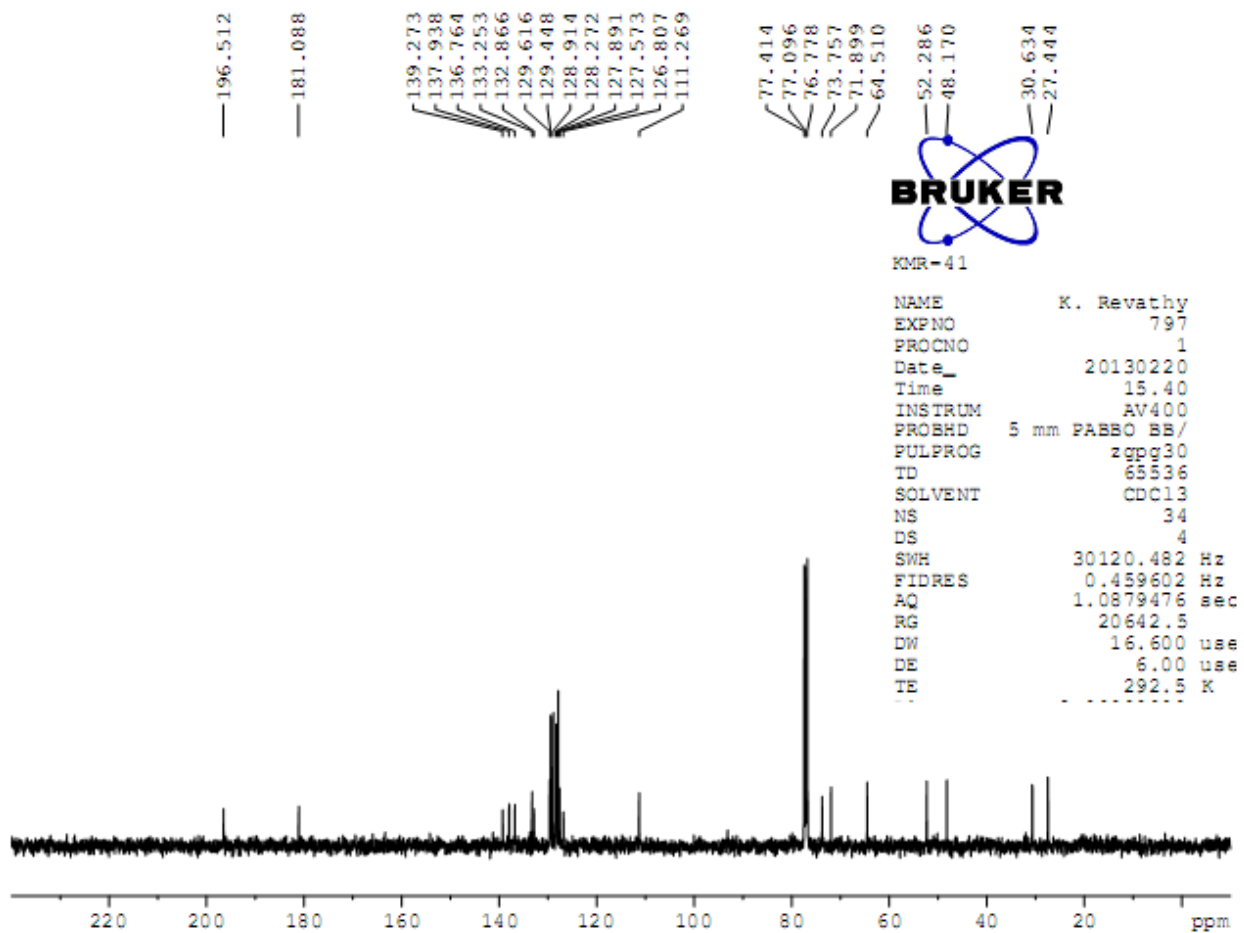

$^{13}\text{C}$  NMR Spectrum of **6i**

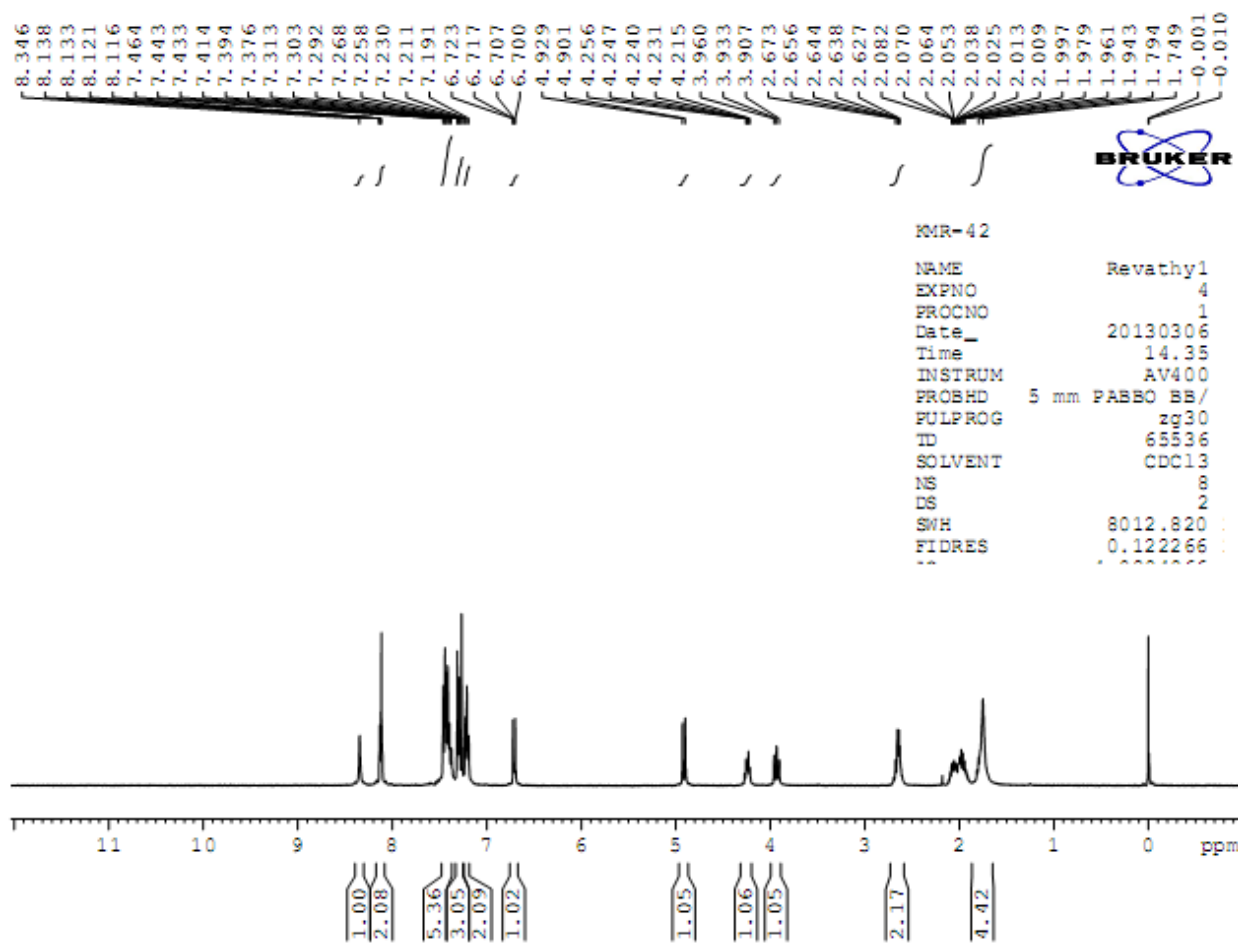

<sup>1</sup>H NMR Spectrum of **6j**

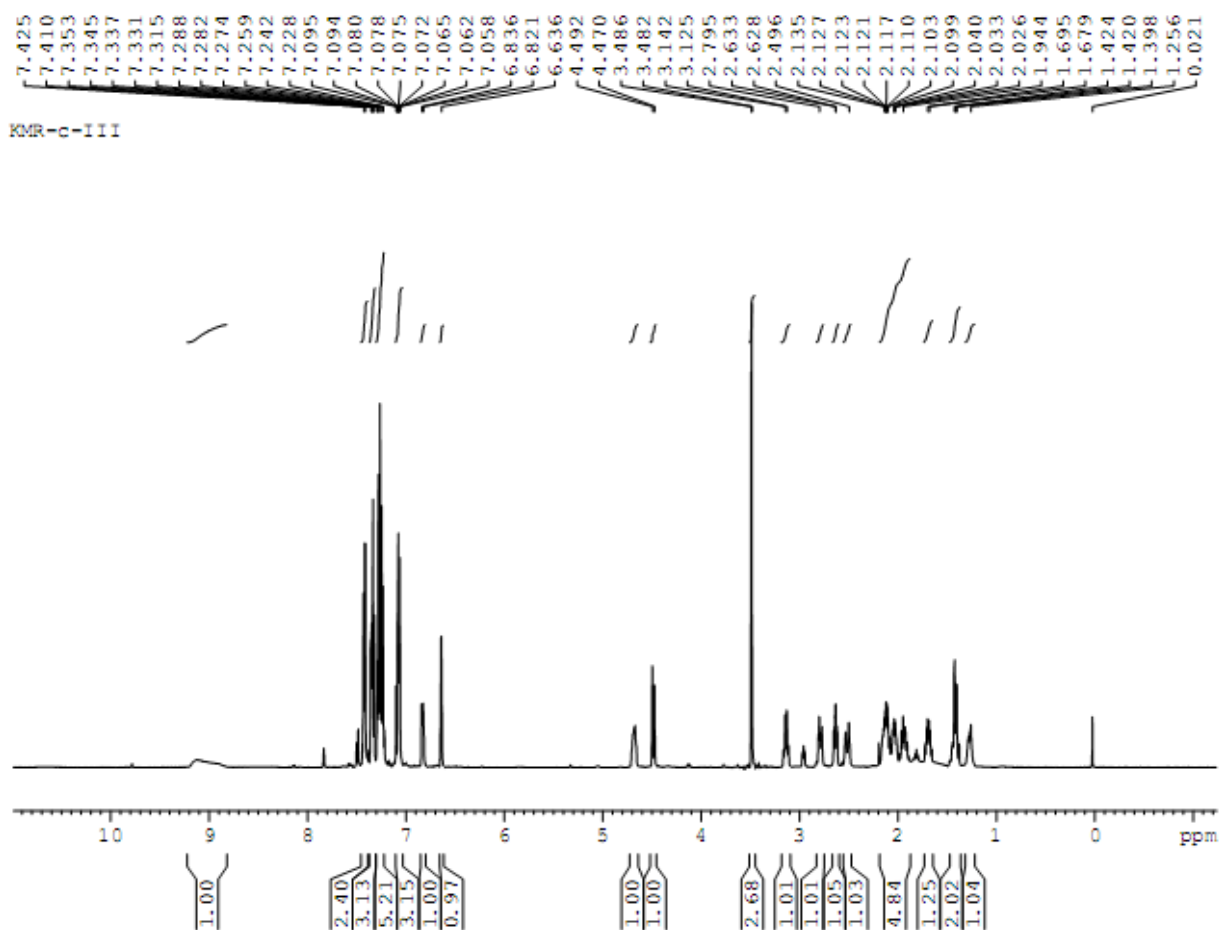

$^1\text{H}$  NMR Spectrum of **8a**



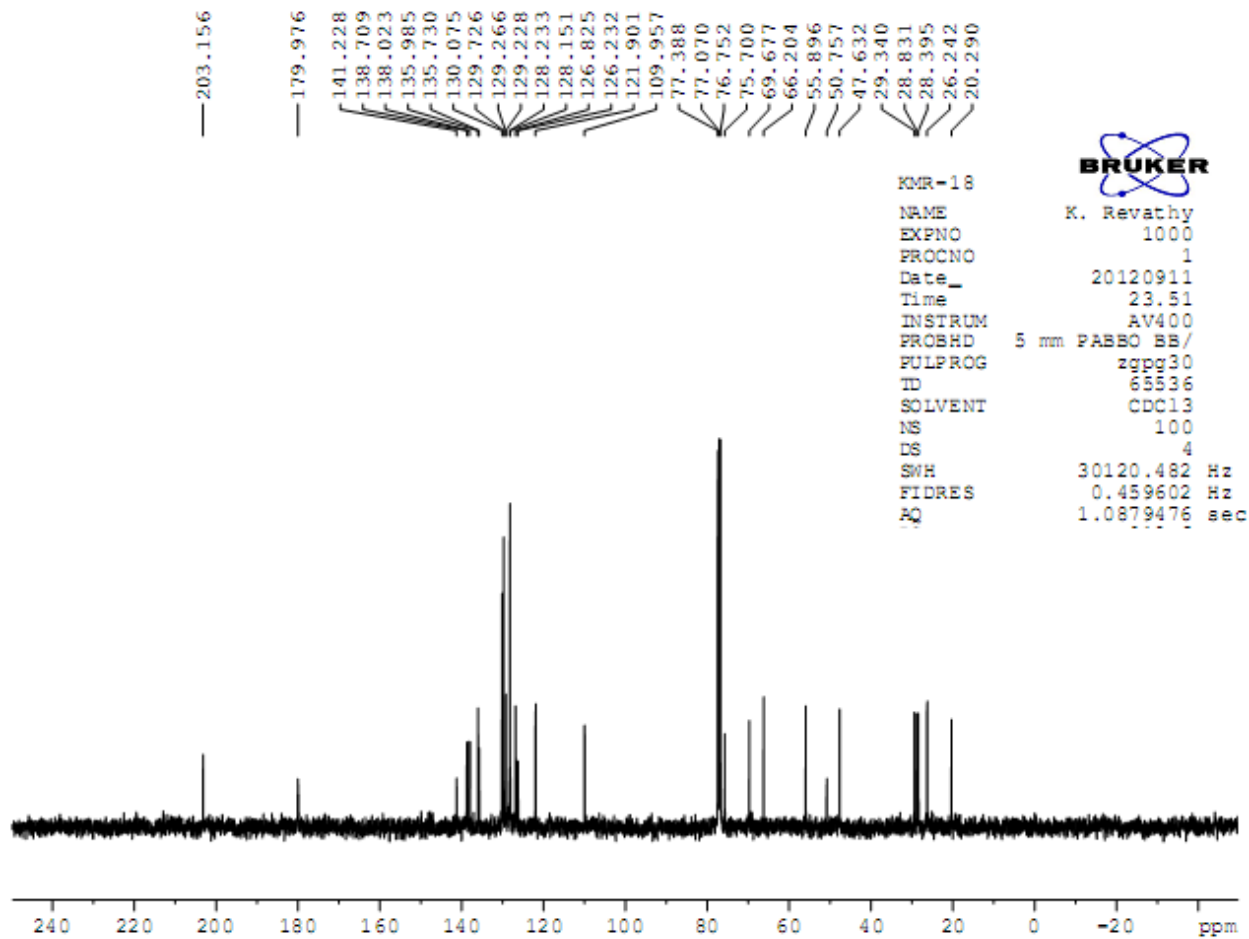

$^{13}\text{C}$  NMR Spectrum of **8a**

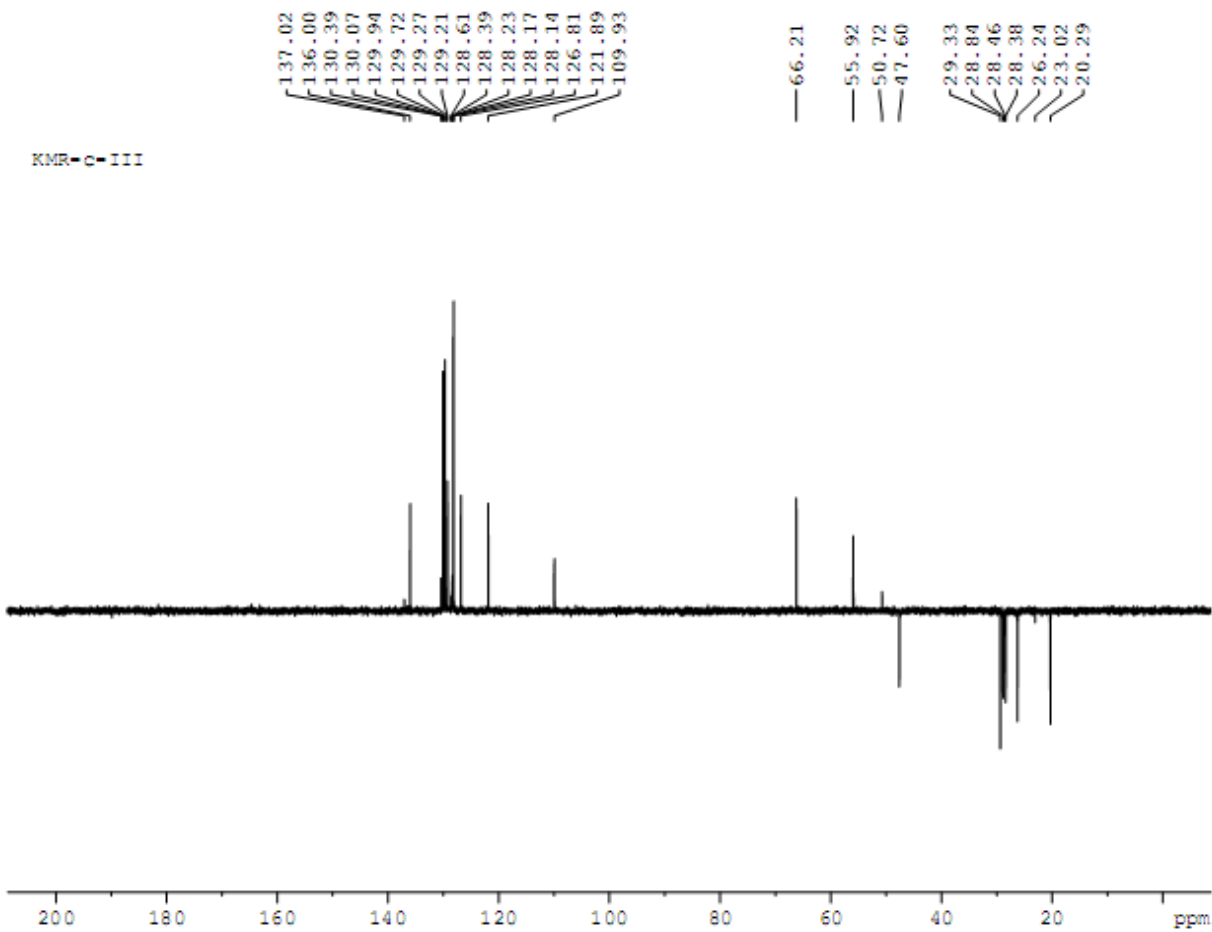

DEPT  $^{13}\text{C}$  NMR Spectrum of **8a**

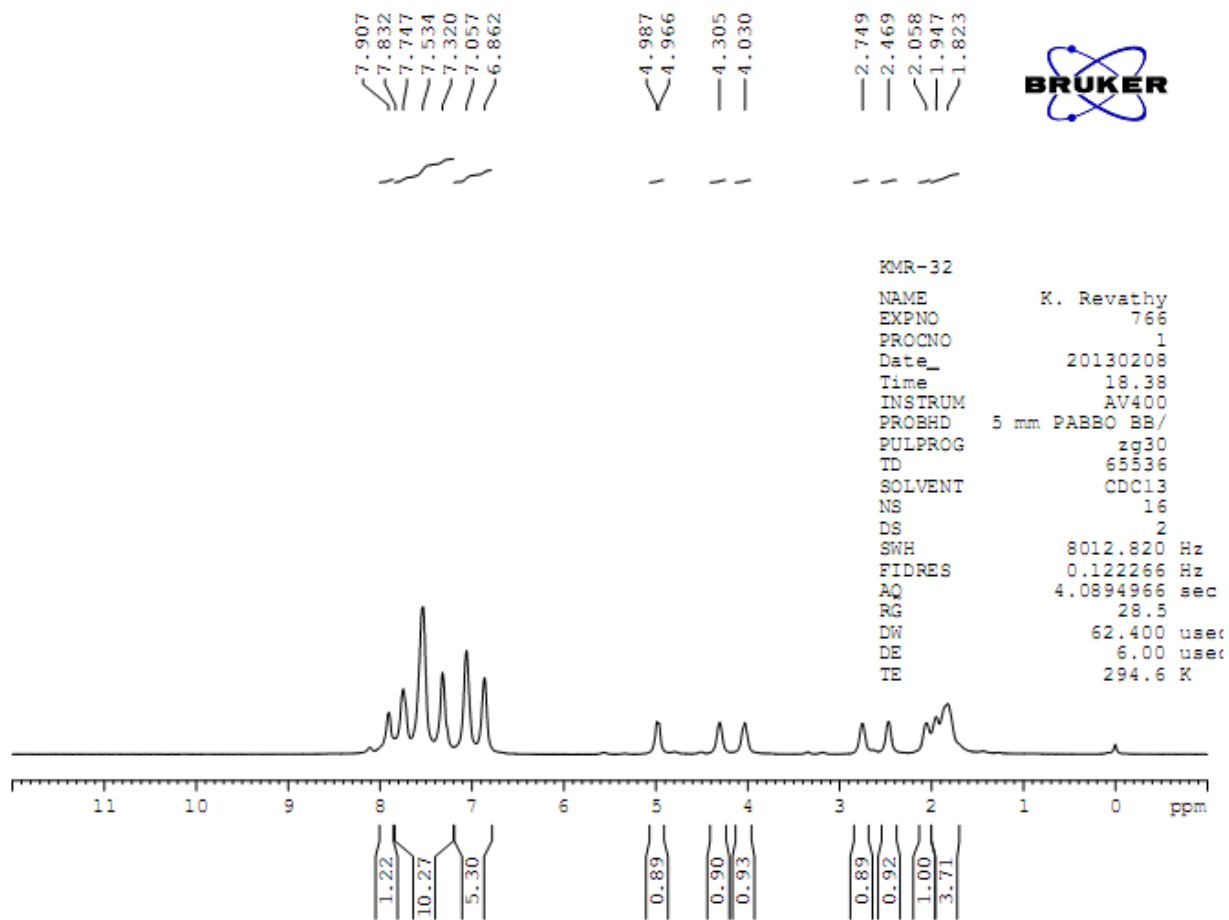

<sup>1</sup>H NMR Spectrum of **10a**

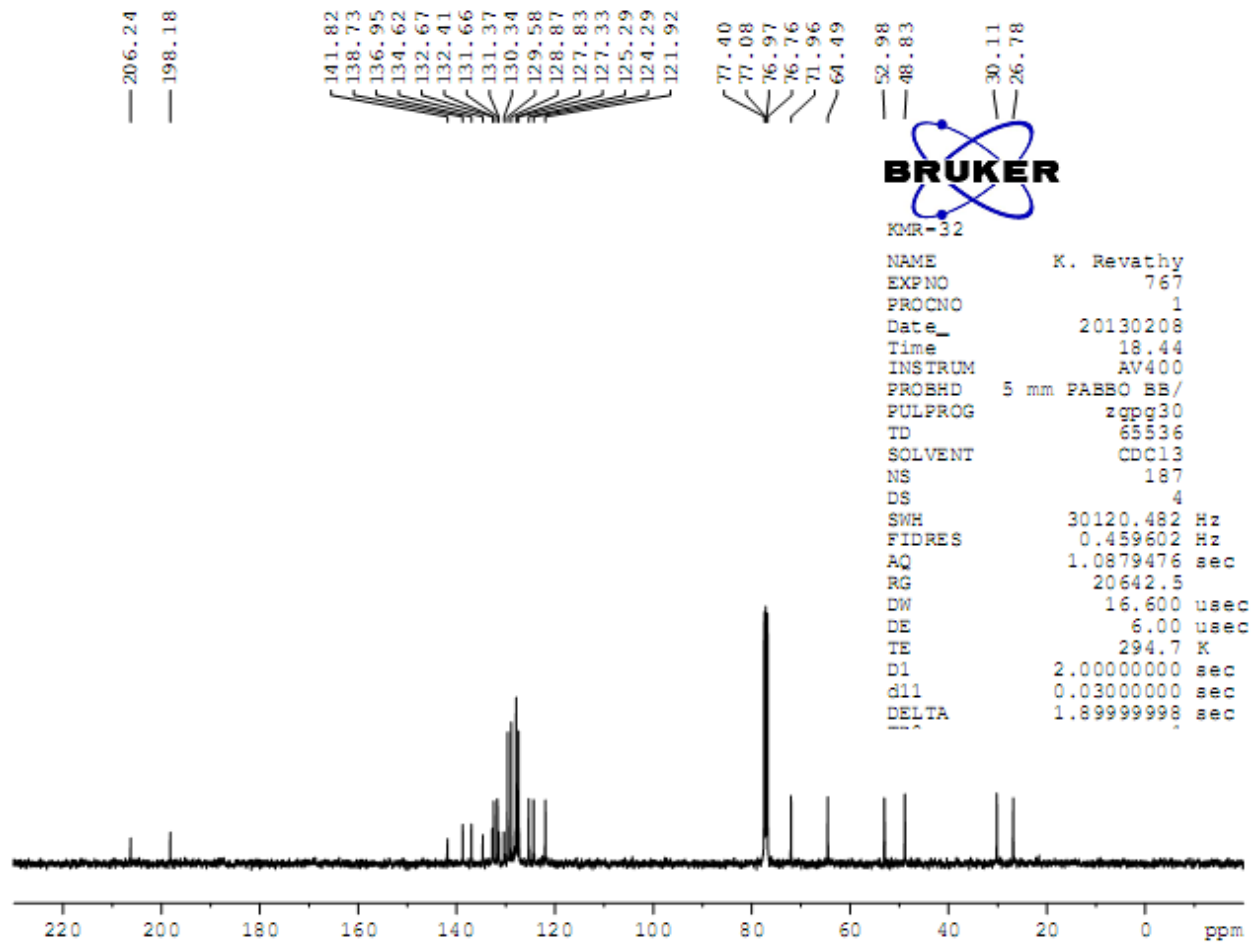

<sup>13</sup>C NMR Spectrum of 10a

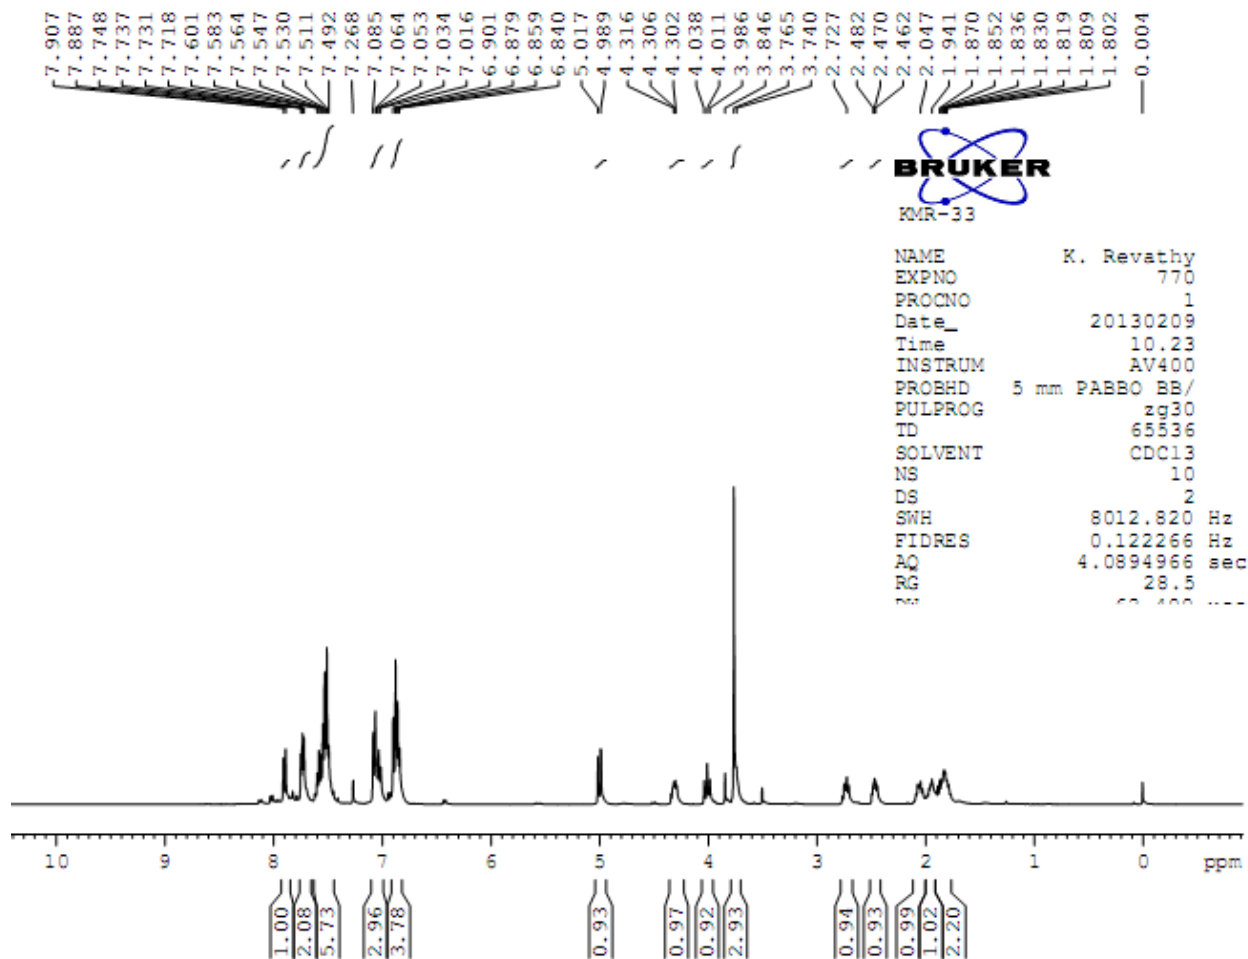

<sup>1</sup>H NMR Spectrum of **10b**

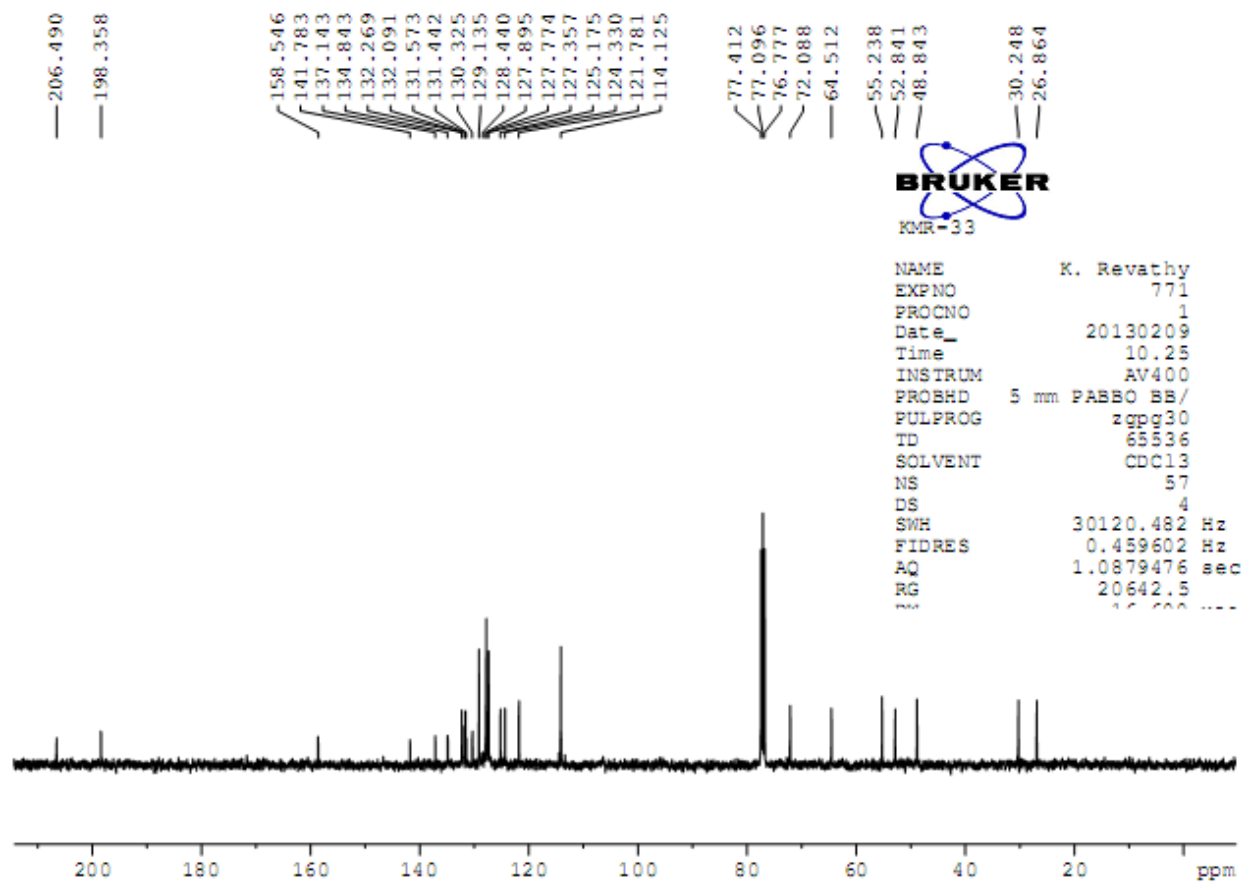

$^{13}\text{C}$  NMR Spectrum of **10b**

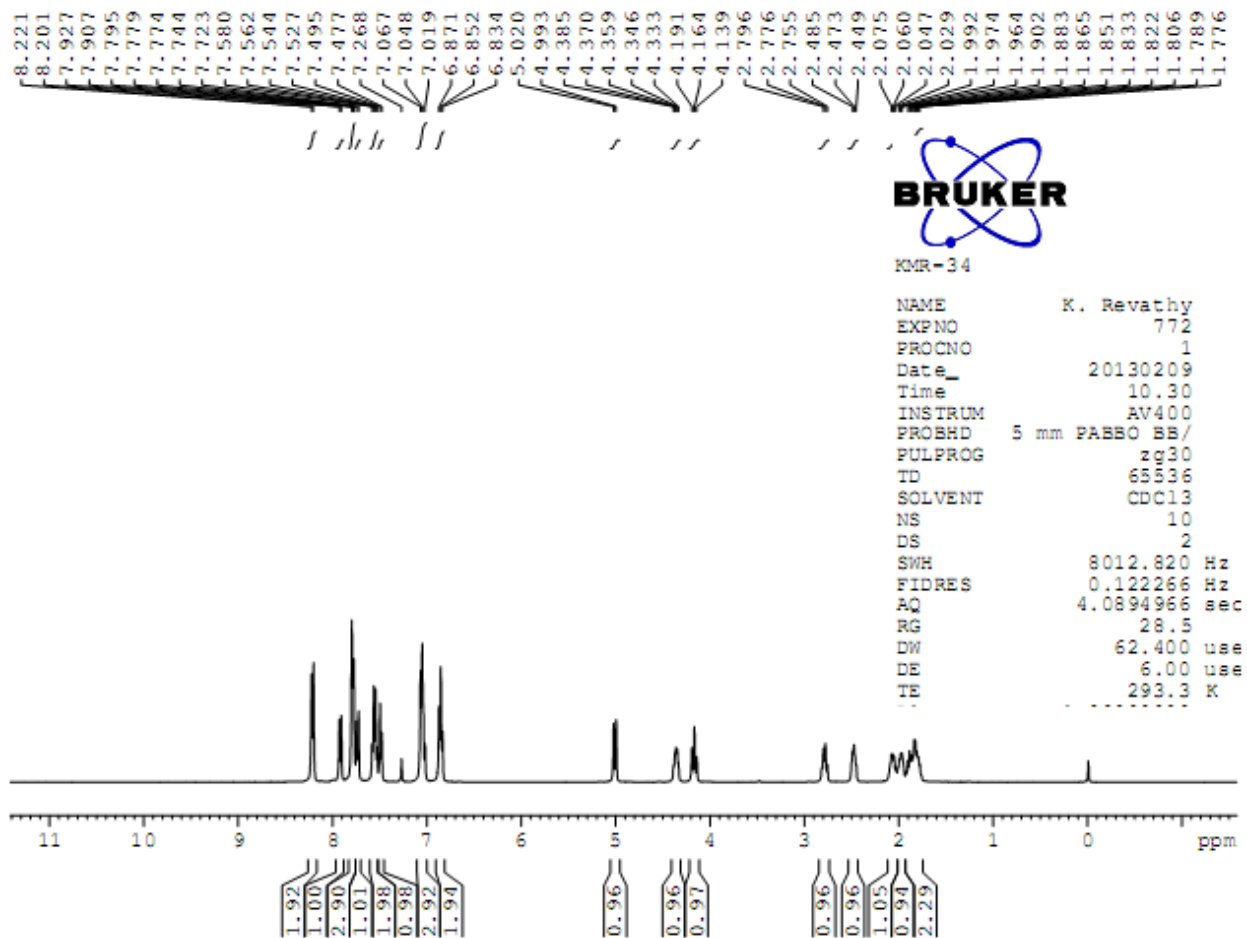

$^1\text{H}$  NMR Spectrum of 10c

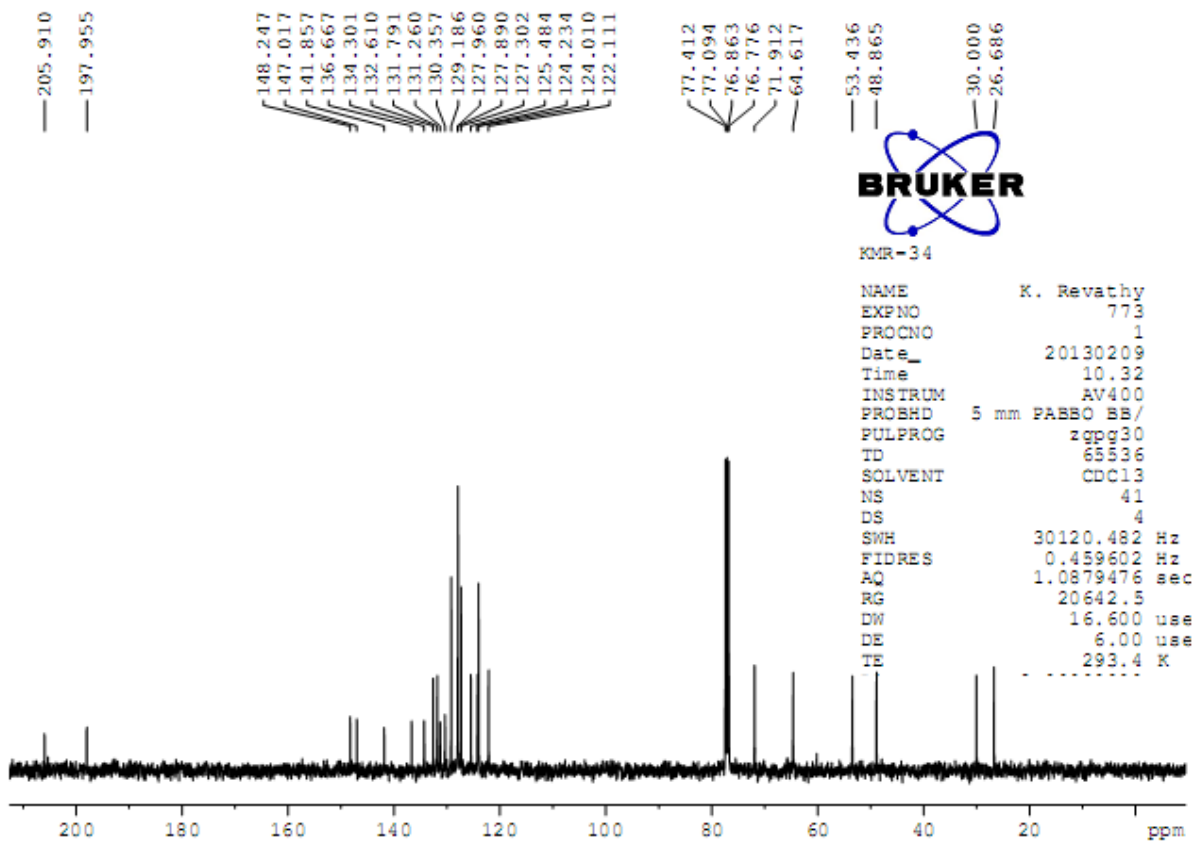

<sup>13</sup>C NMR Spectrum of 10c



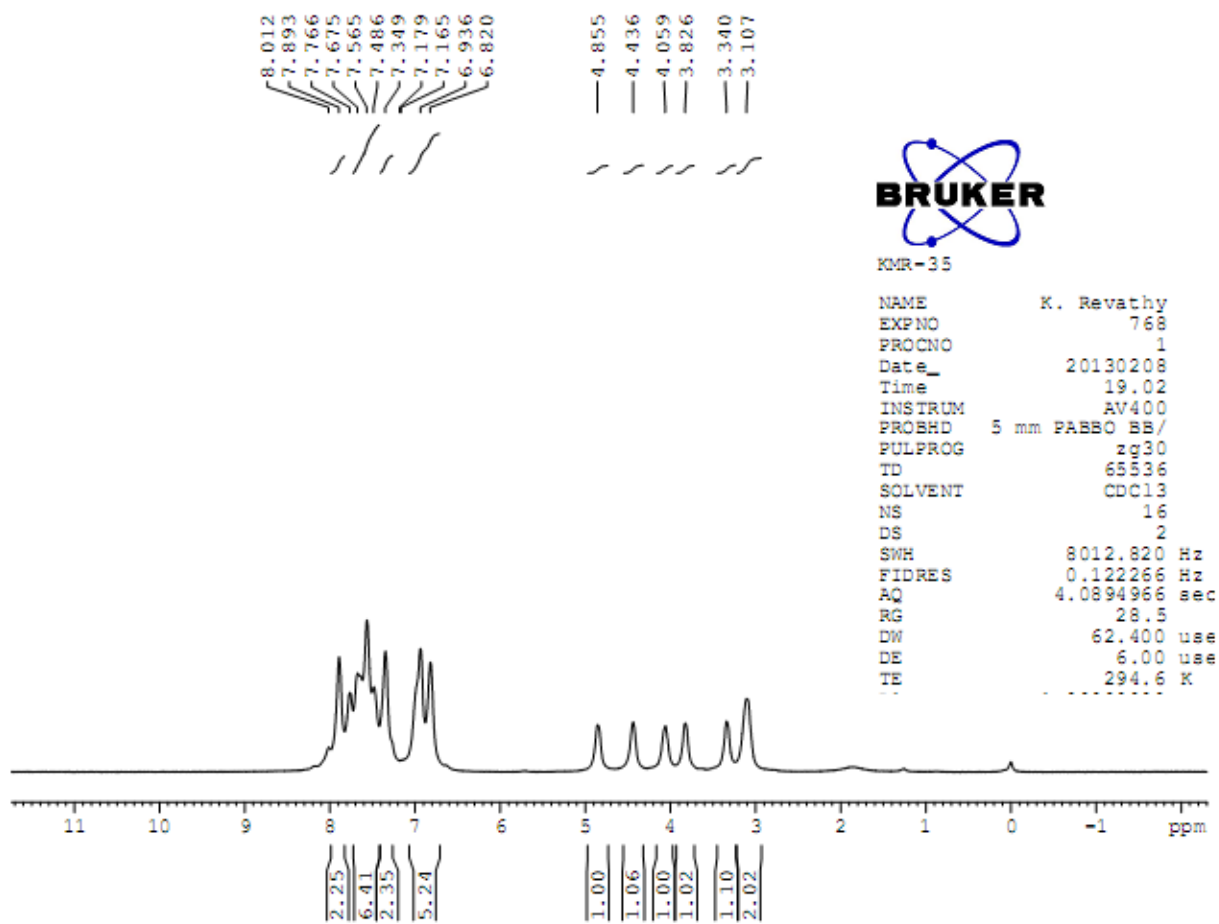

<sup>1</sup>H NMR Spectrum of **10d**

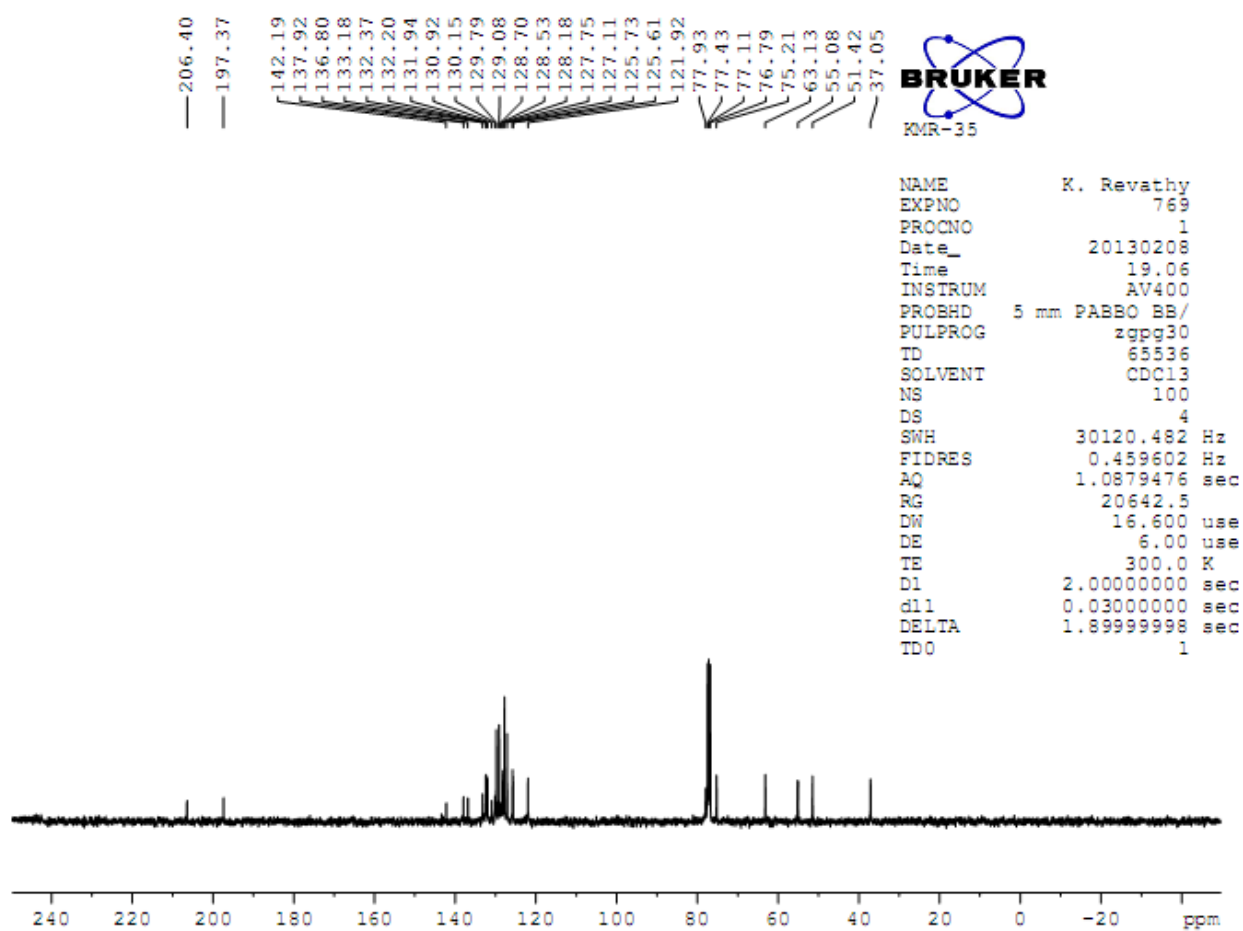

<sup>13</sup>C NMR Spectrum of **10d**

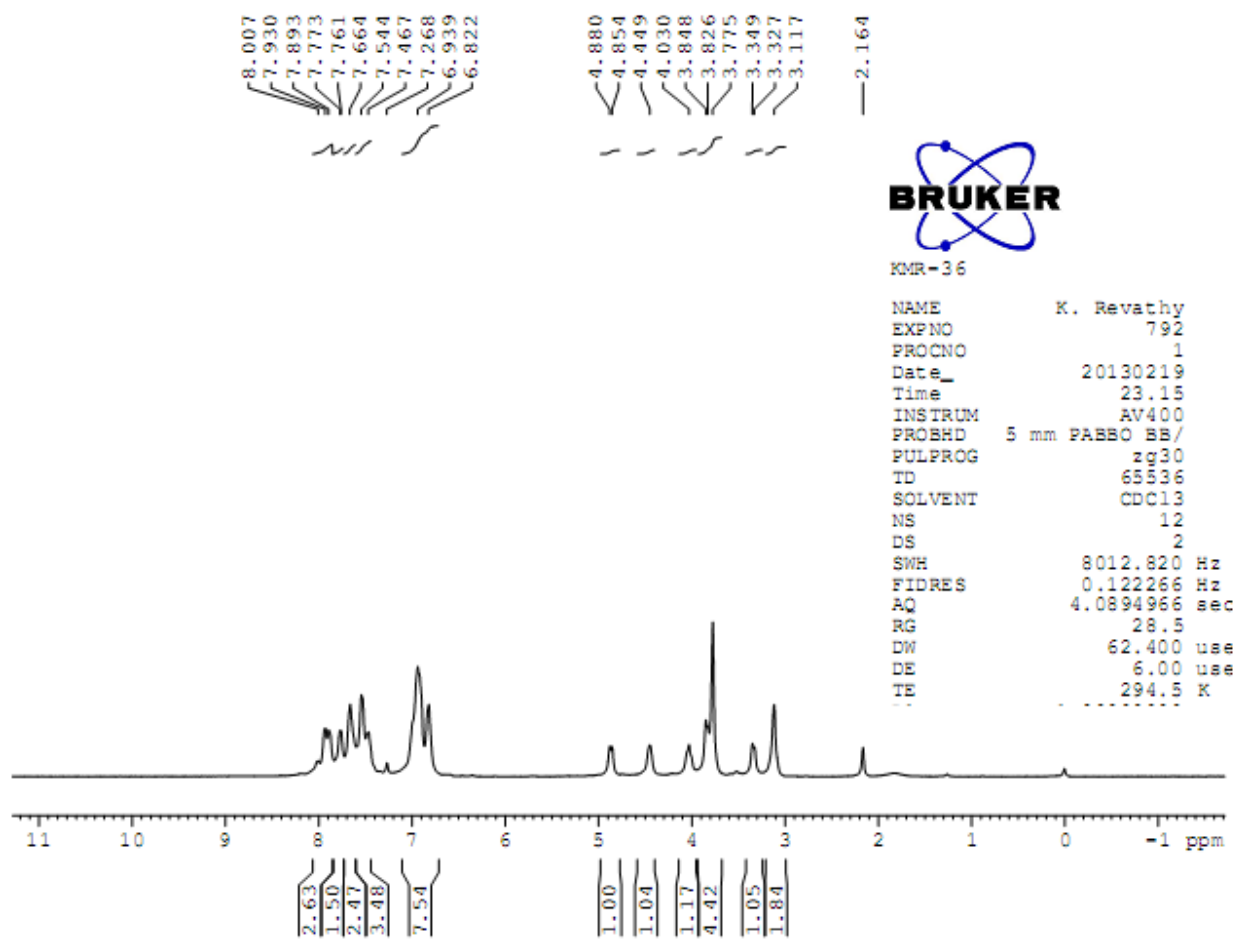

<sup>1</sup>H NMR Spectrum of **10e**

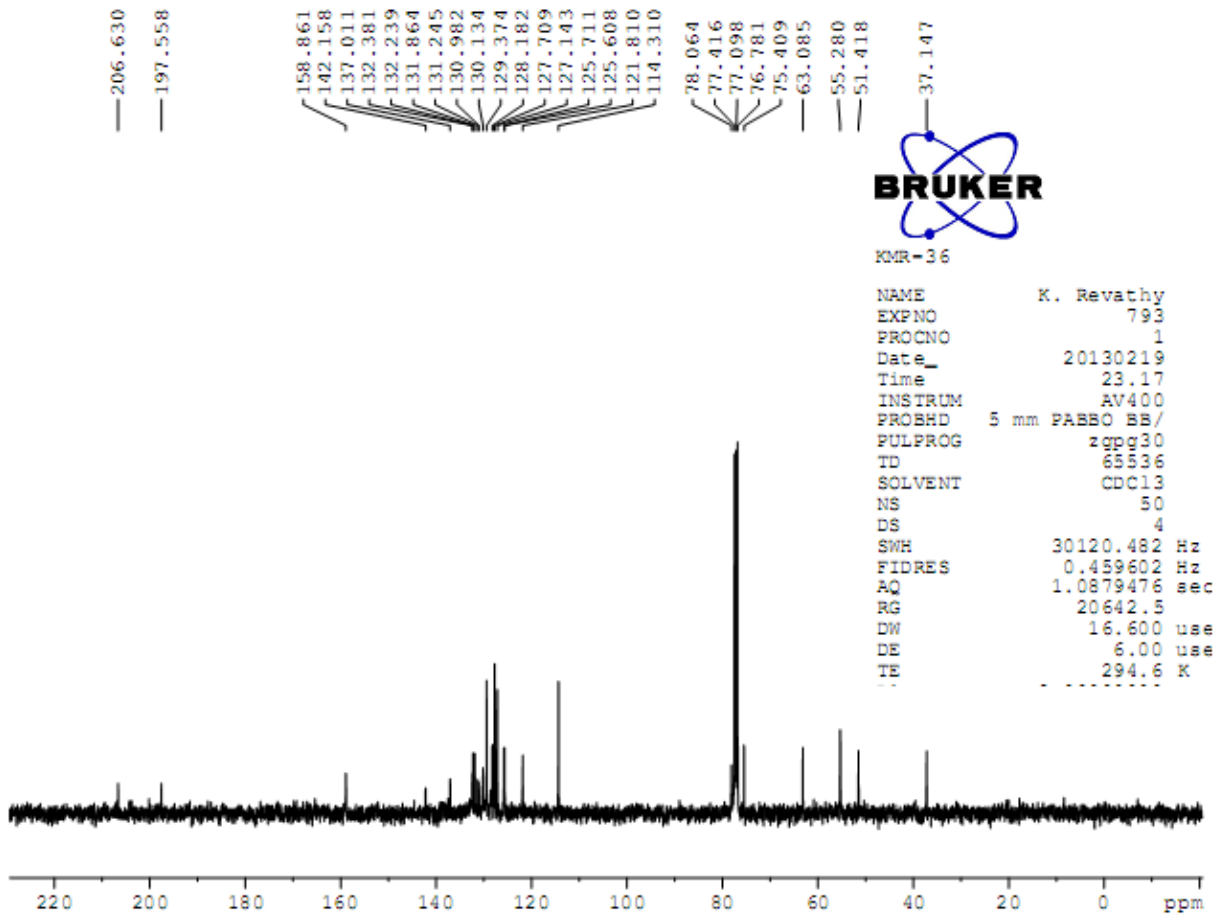

<sup>13</sup>C NMR Spectrum of 10e

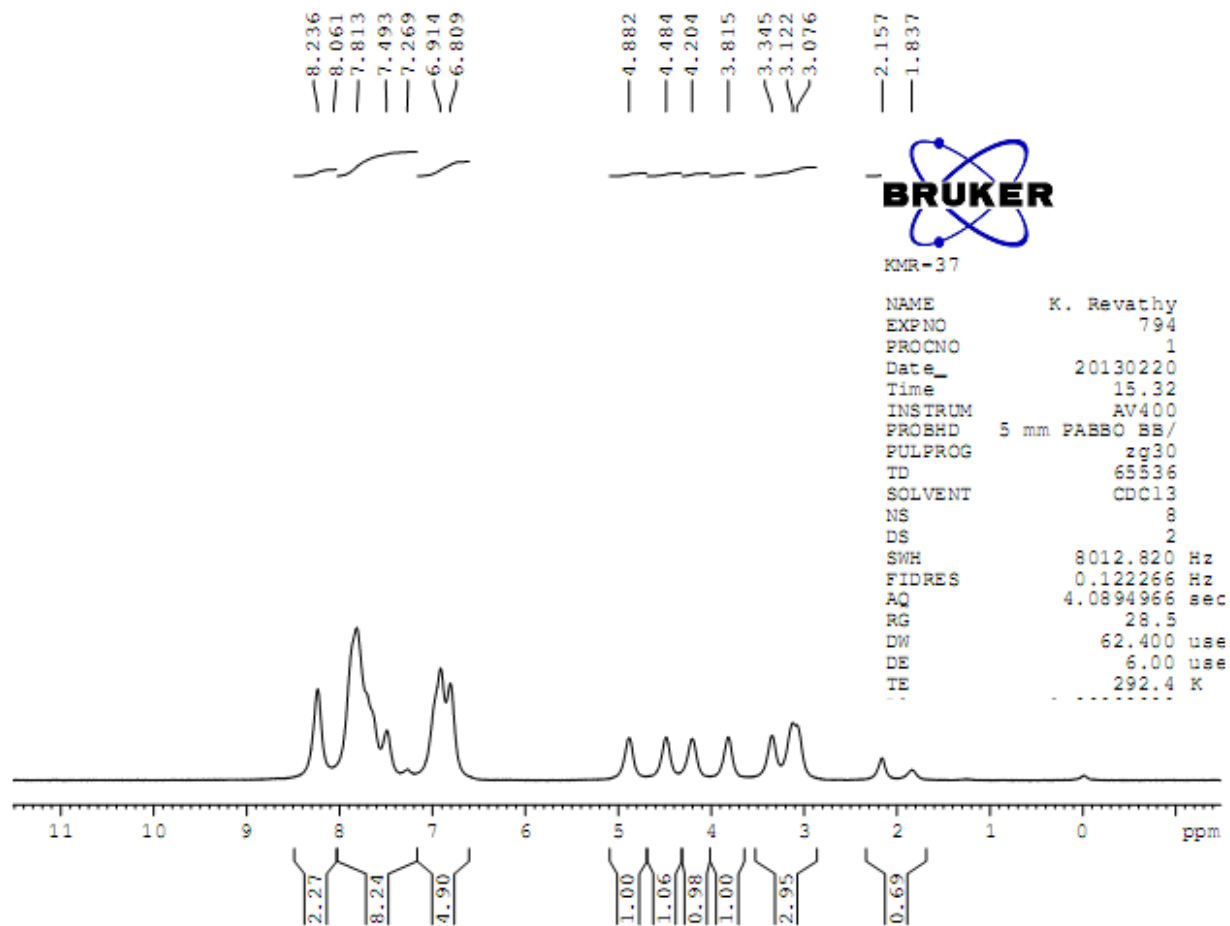

<sup>1</sup>H NMR Spectrum of **10f**

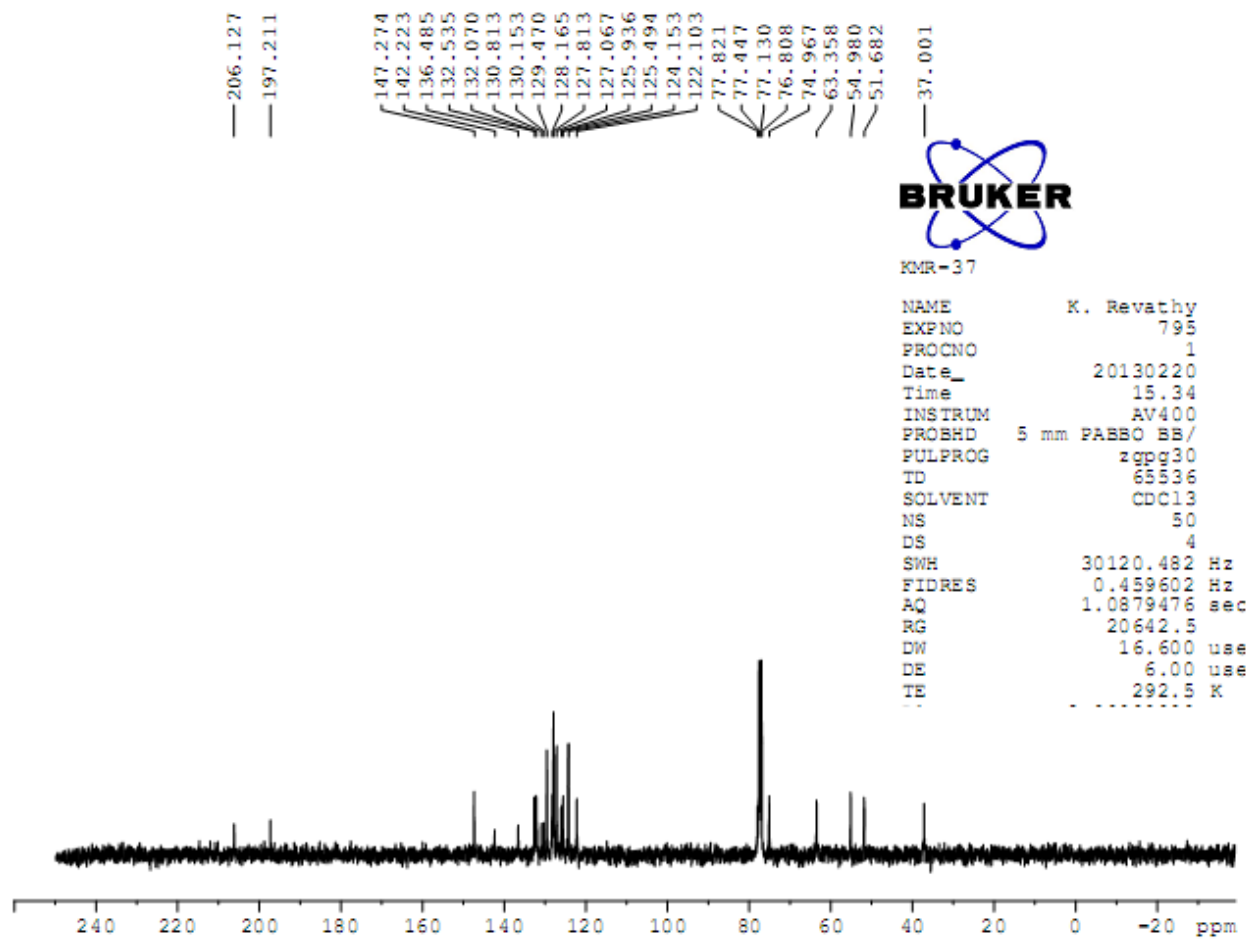

$^{13}\text{C}$  NMR Spectrum of **10f**

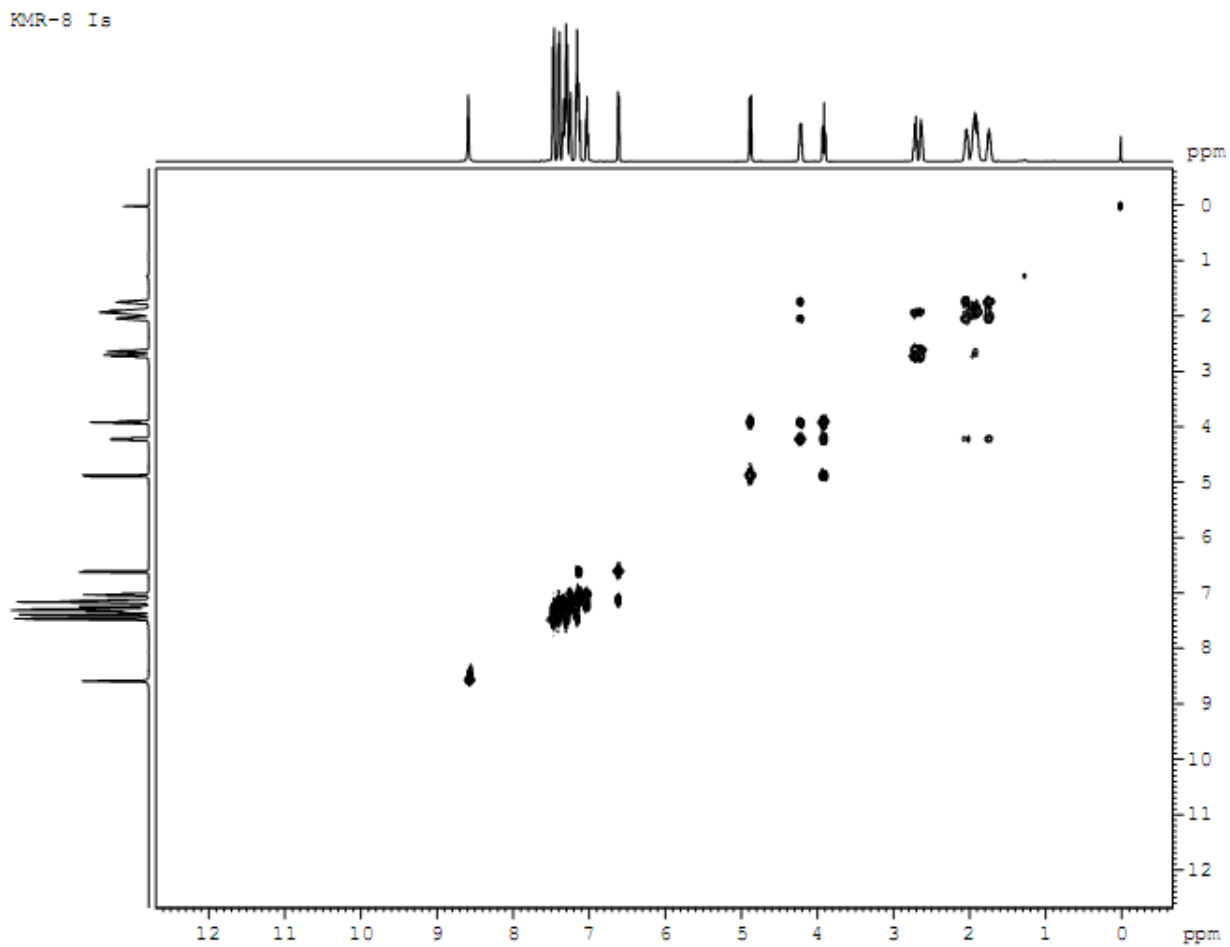

$^1\text{H}$ - $^1\text{H}$  COSY spectrum of compound 6b

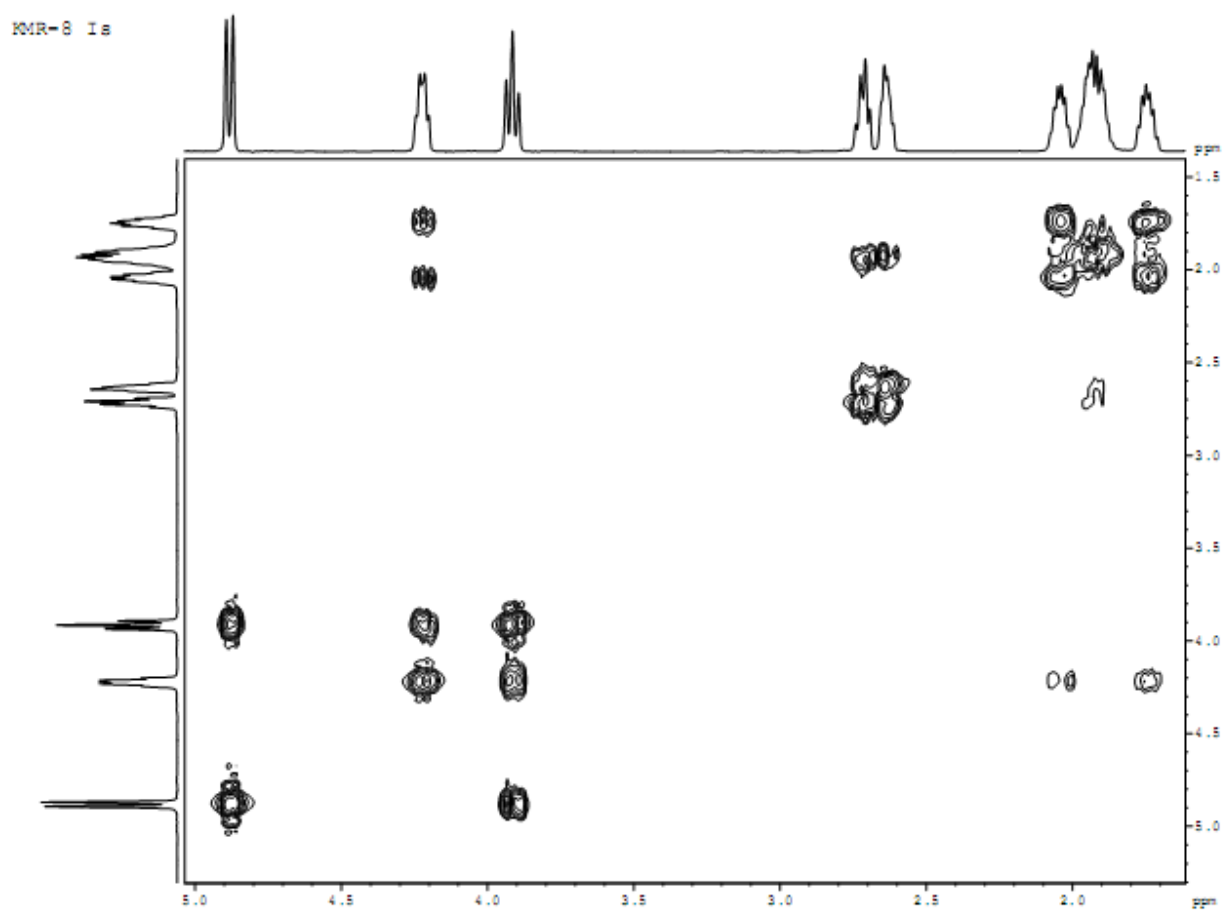

Expanded  $^1\text{H}$ - $^1\text{H}$  COSY spectrum of compound 6b



KMR-8 1a

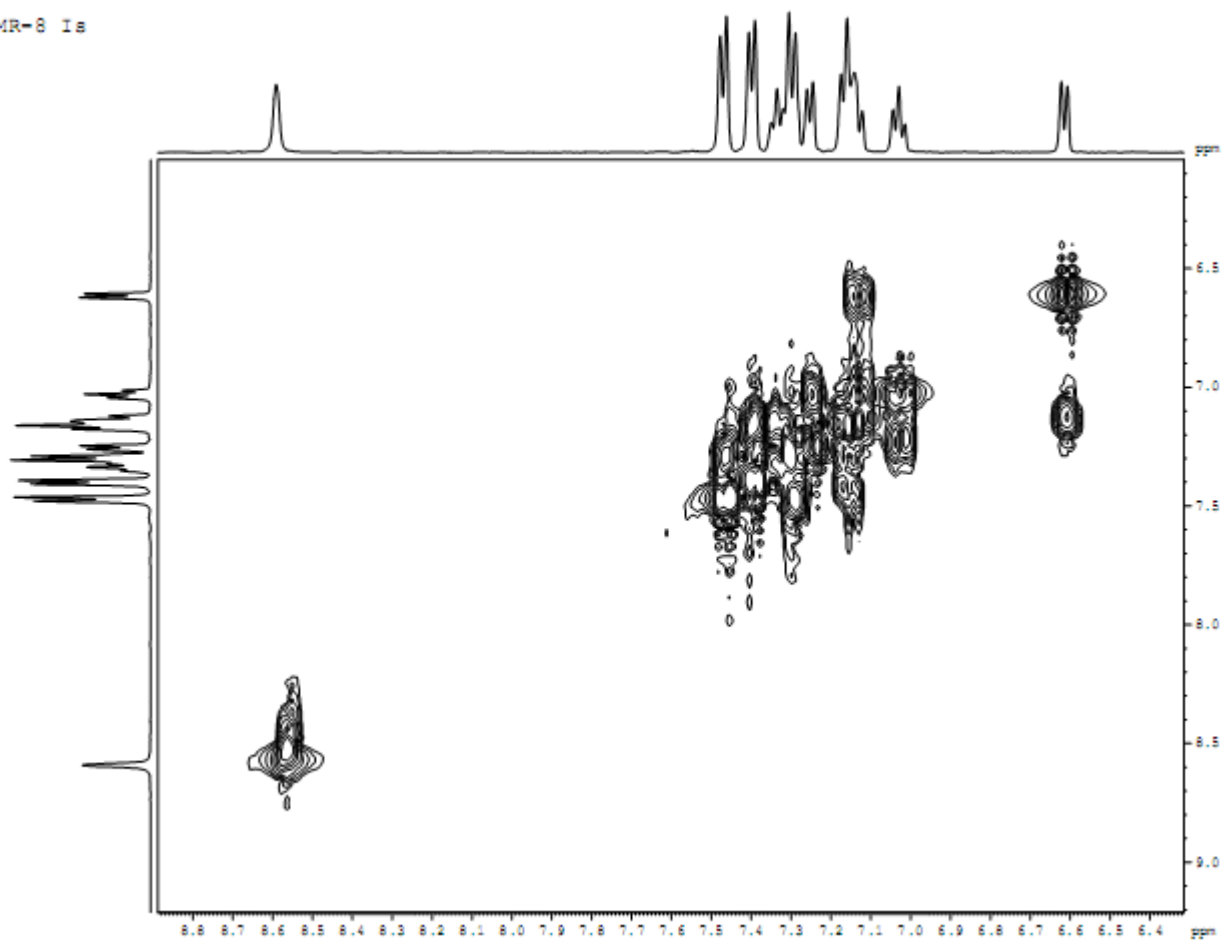

Expanded  $^1\text{H}$ - $^1\text{H}$  COSY spectrum of compound 6b

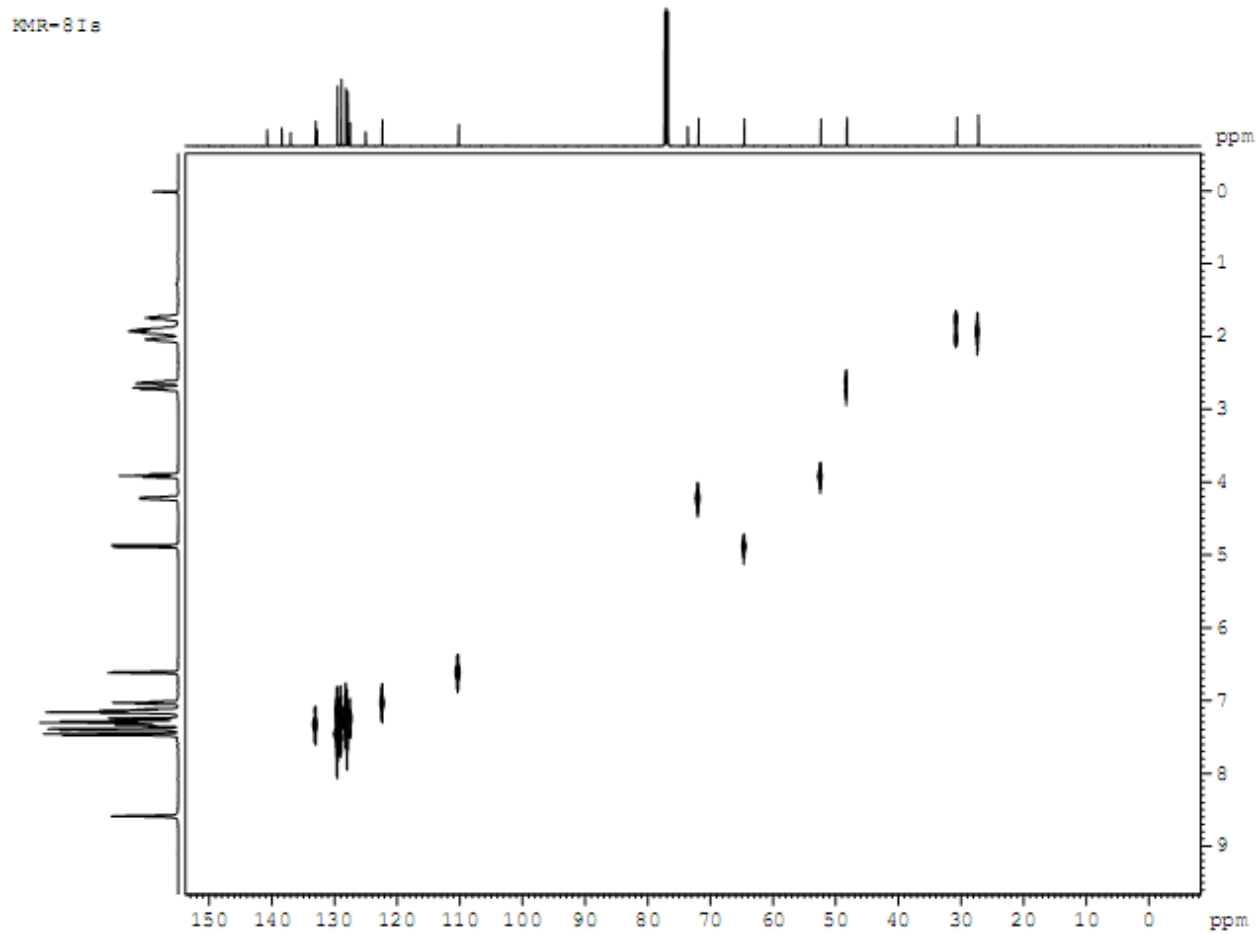

$^1\text{H}$ - $^{13}\text{C}$  COSY spectrum of compound 6b

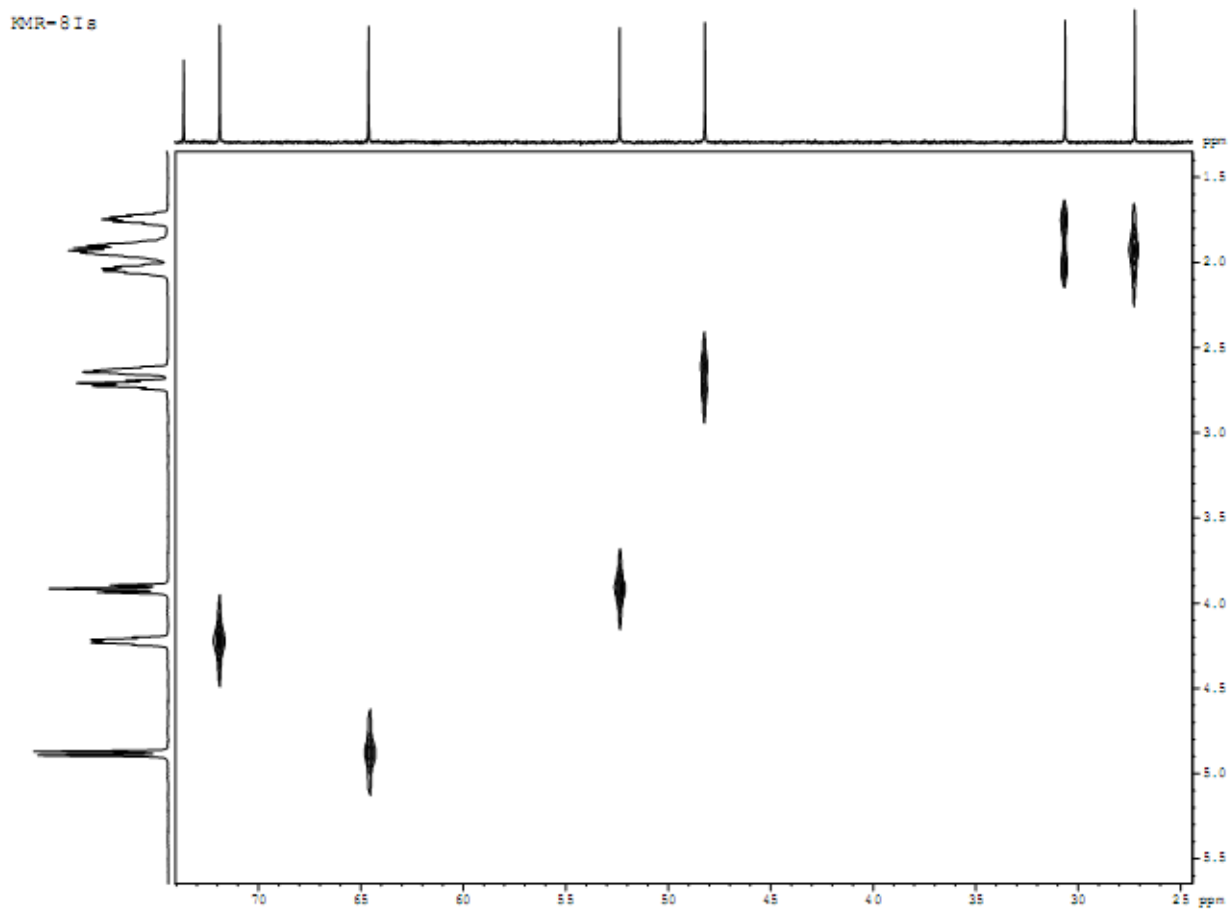

Expanded  $^1\text{H}$ - $^{13}\text{C}$  COSY spectrum of compound 6b

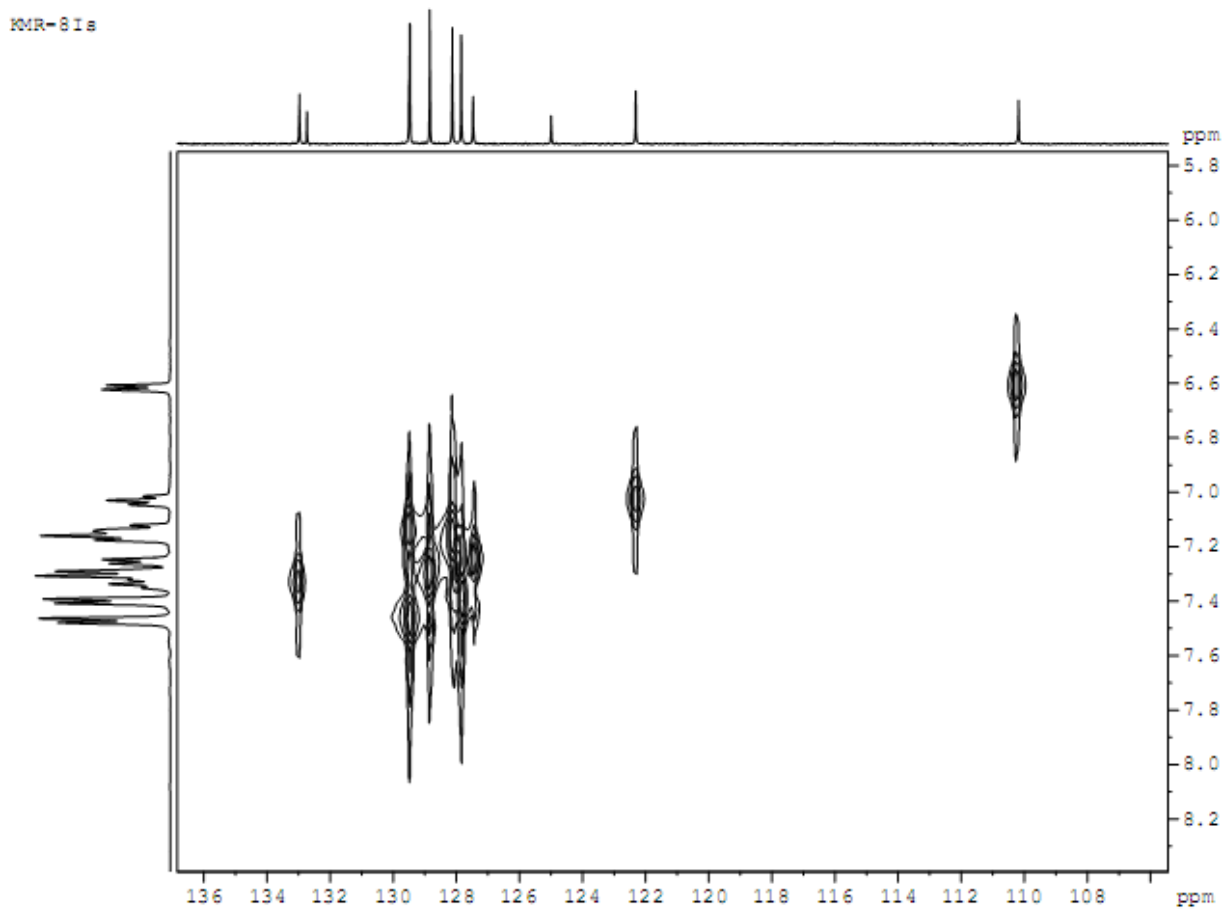

Expanded  $^1\text{H}$ - $^{13}\text{C}$  COSY spectrum of compound 6b

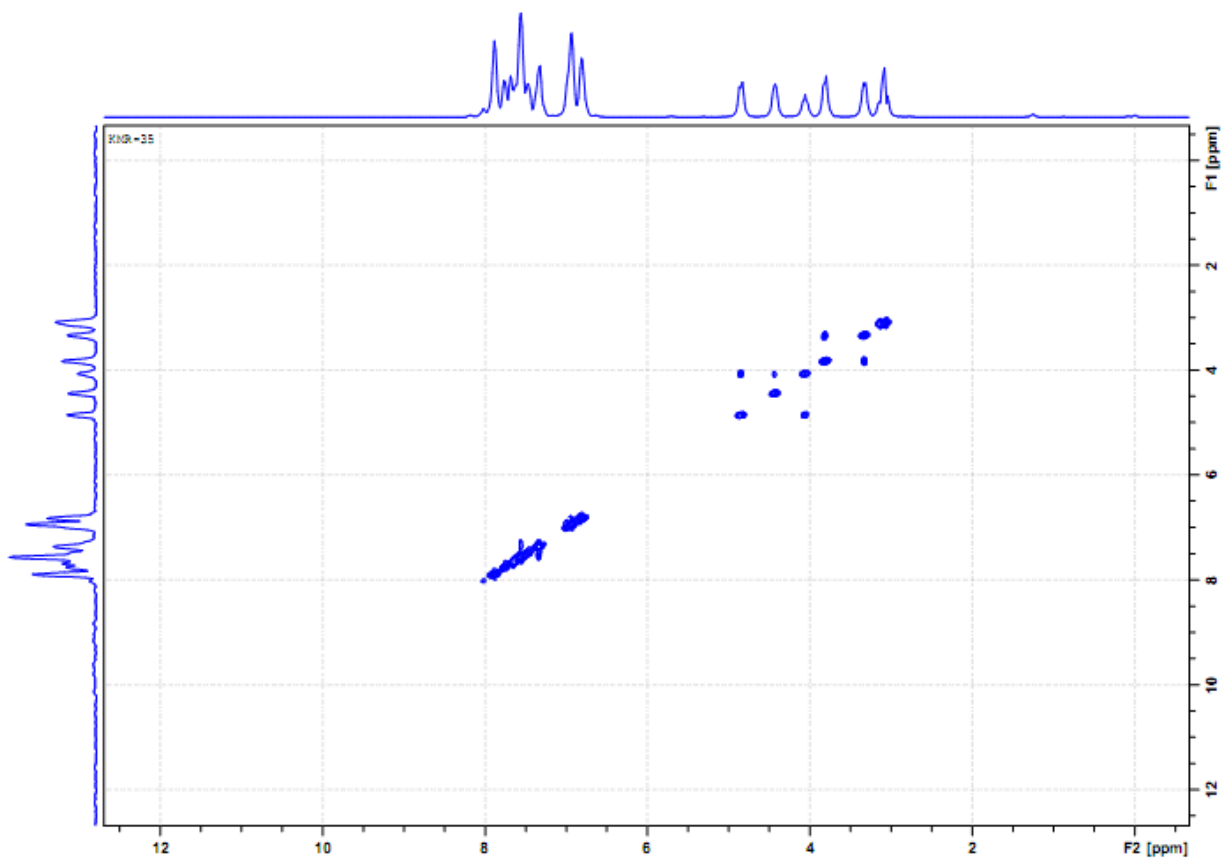

$^1\text{H}$ - $^1\text{H}$  COSY spectrum of compound 10d

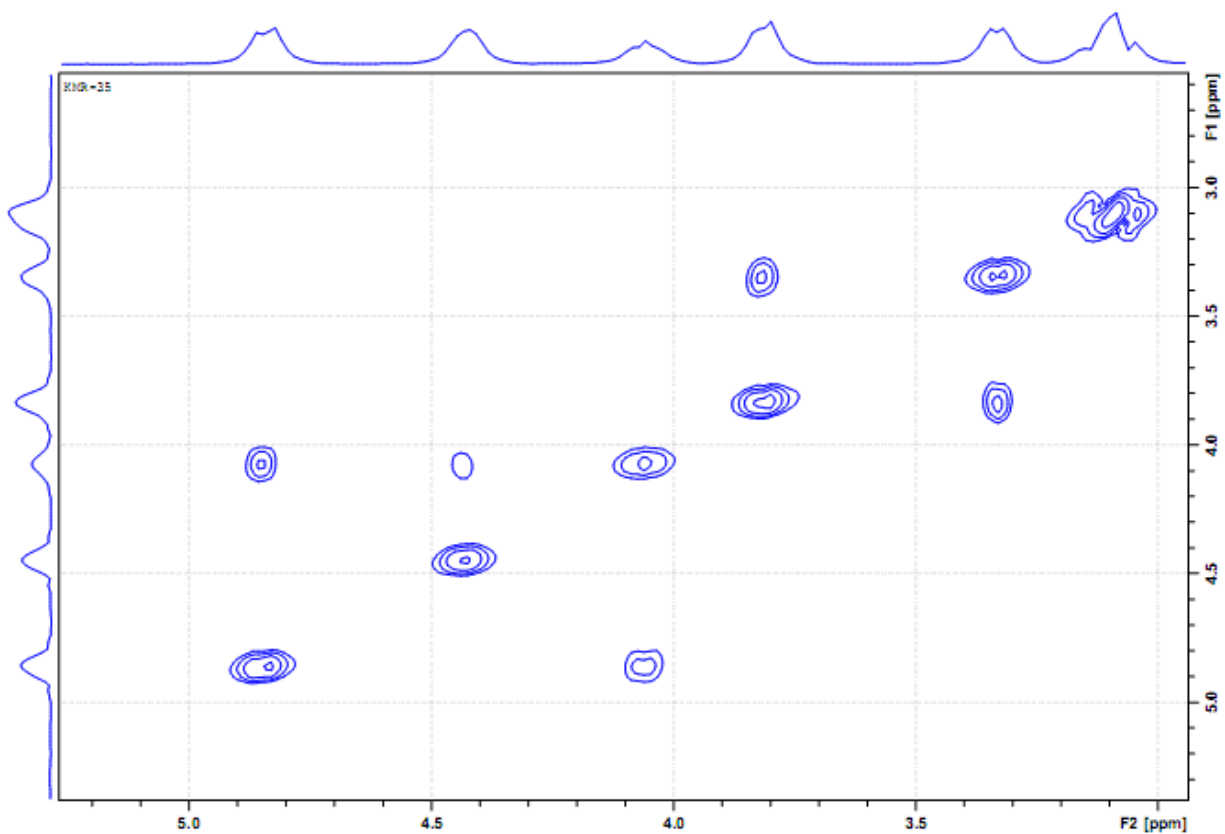

Expanded  $^1\text{H}$ - $^1\text{H}$  COSY spectrum of compound 10d

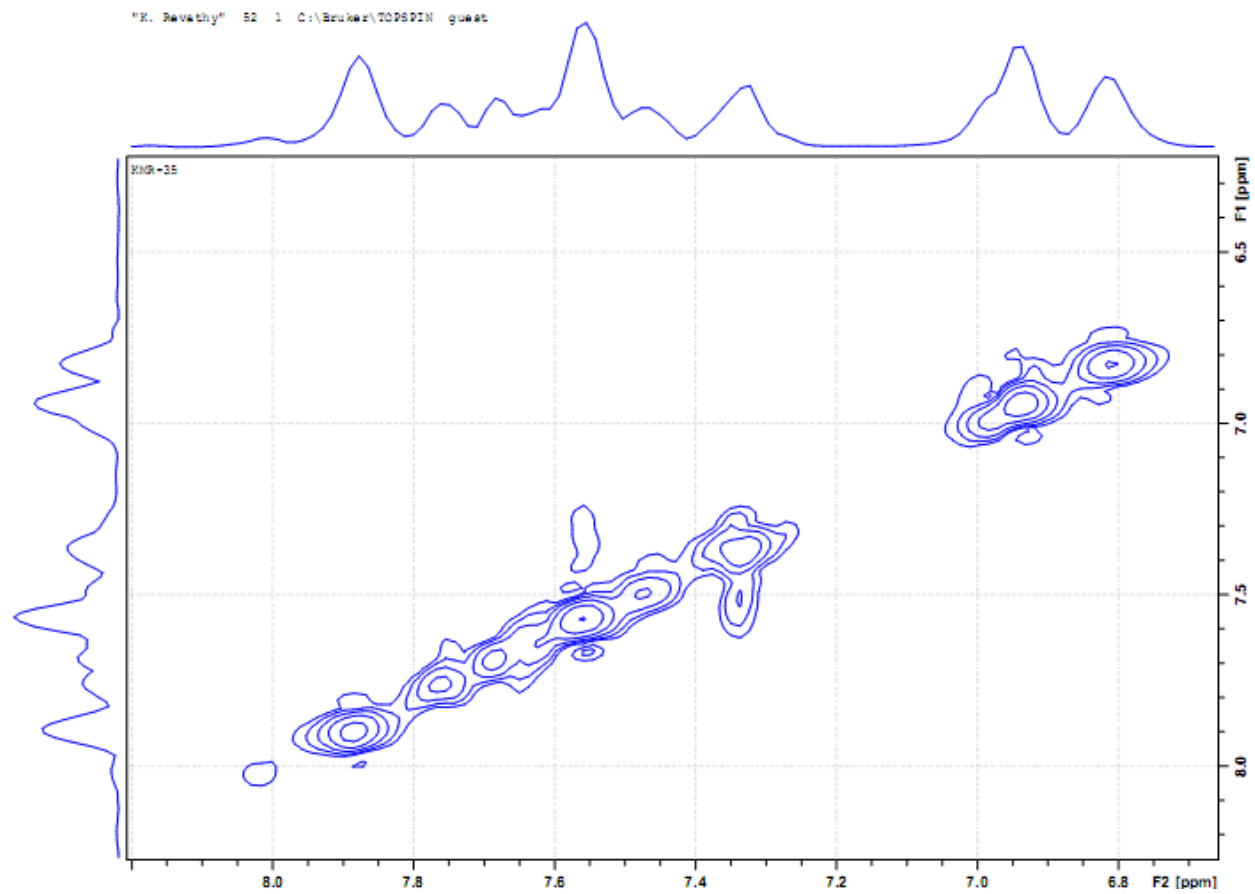

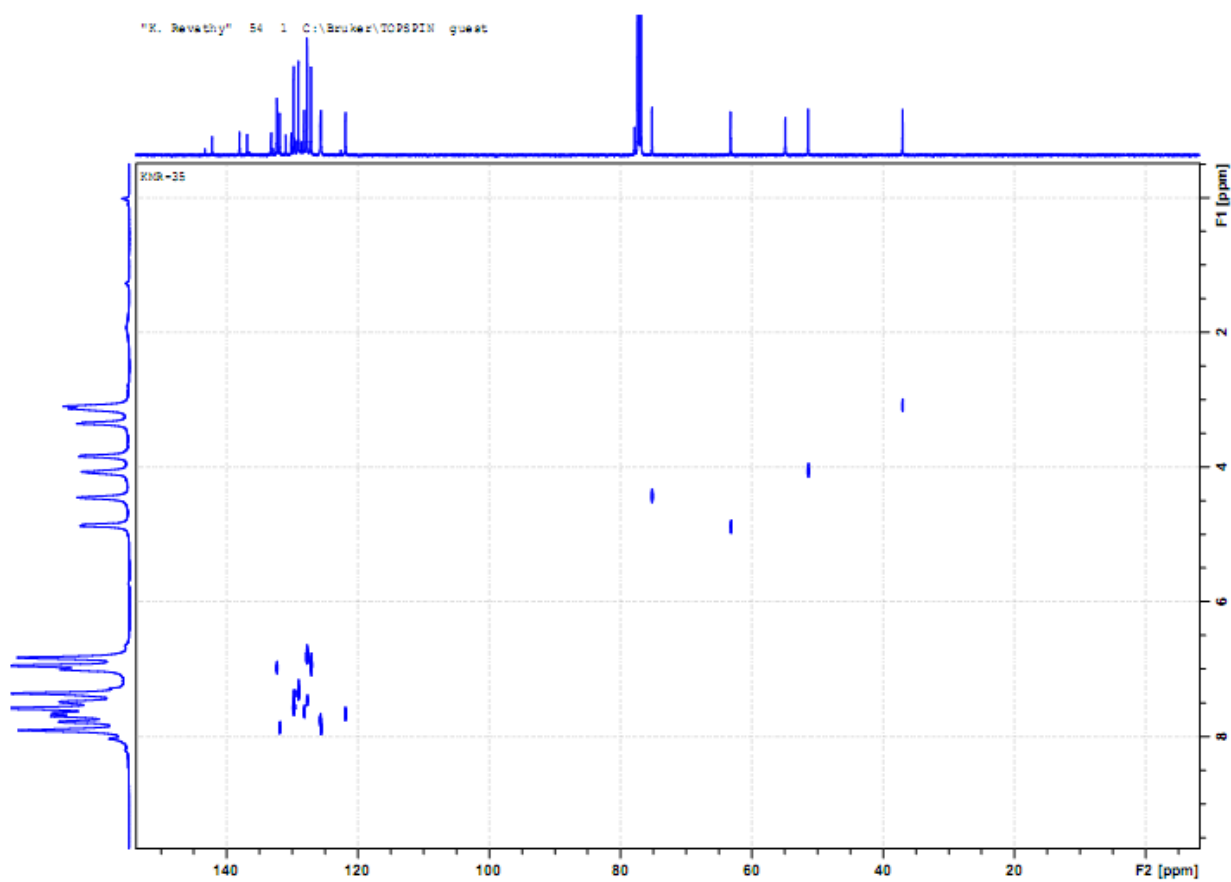

$^1\text{H}$ - $^{13}\text{C}$  COSY spectrum of compound 10d



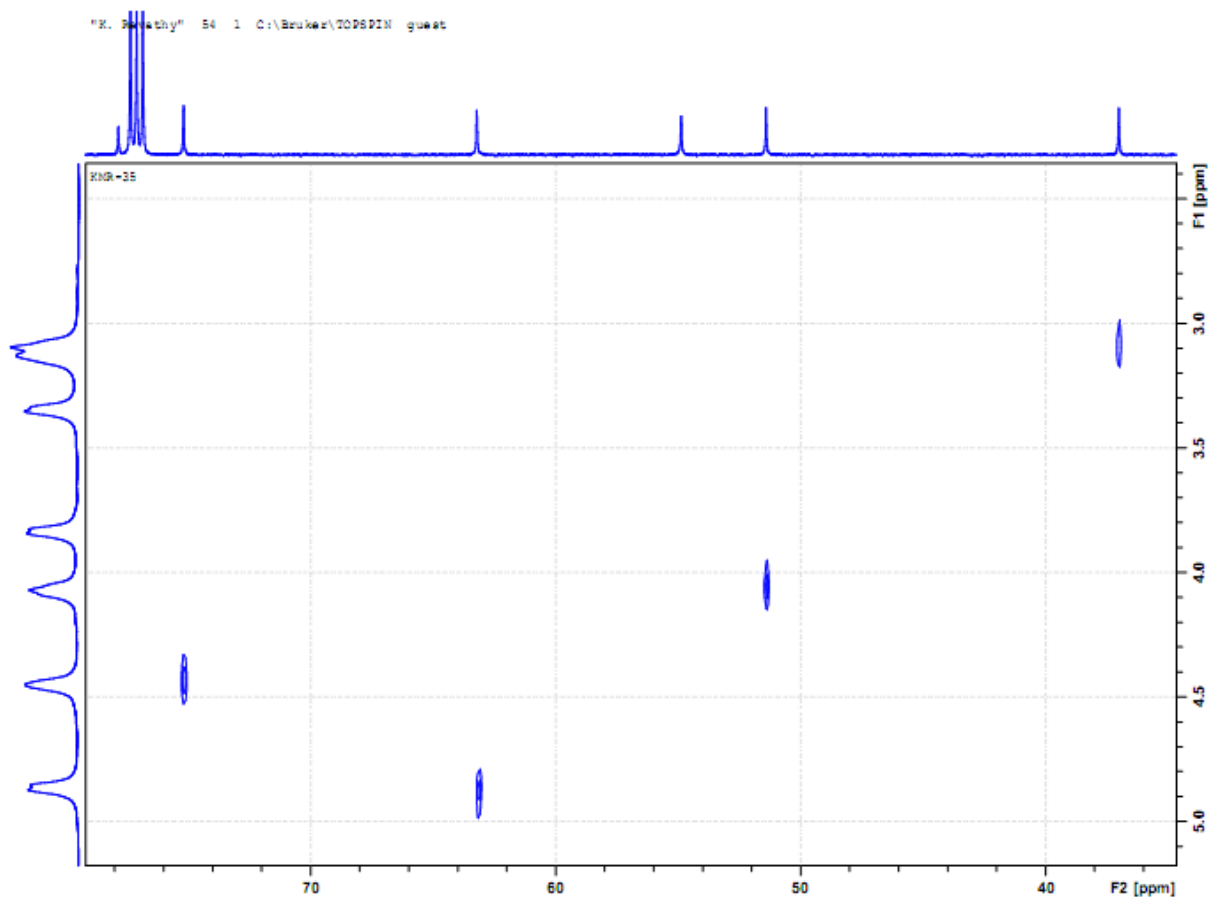

Expanded  $^1\text{H}$ - $^{13}\text{C}$  COSY spectrum of compound 10d

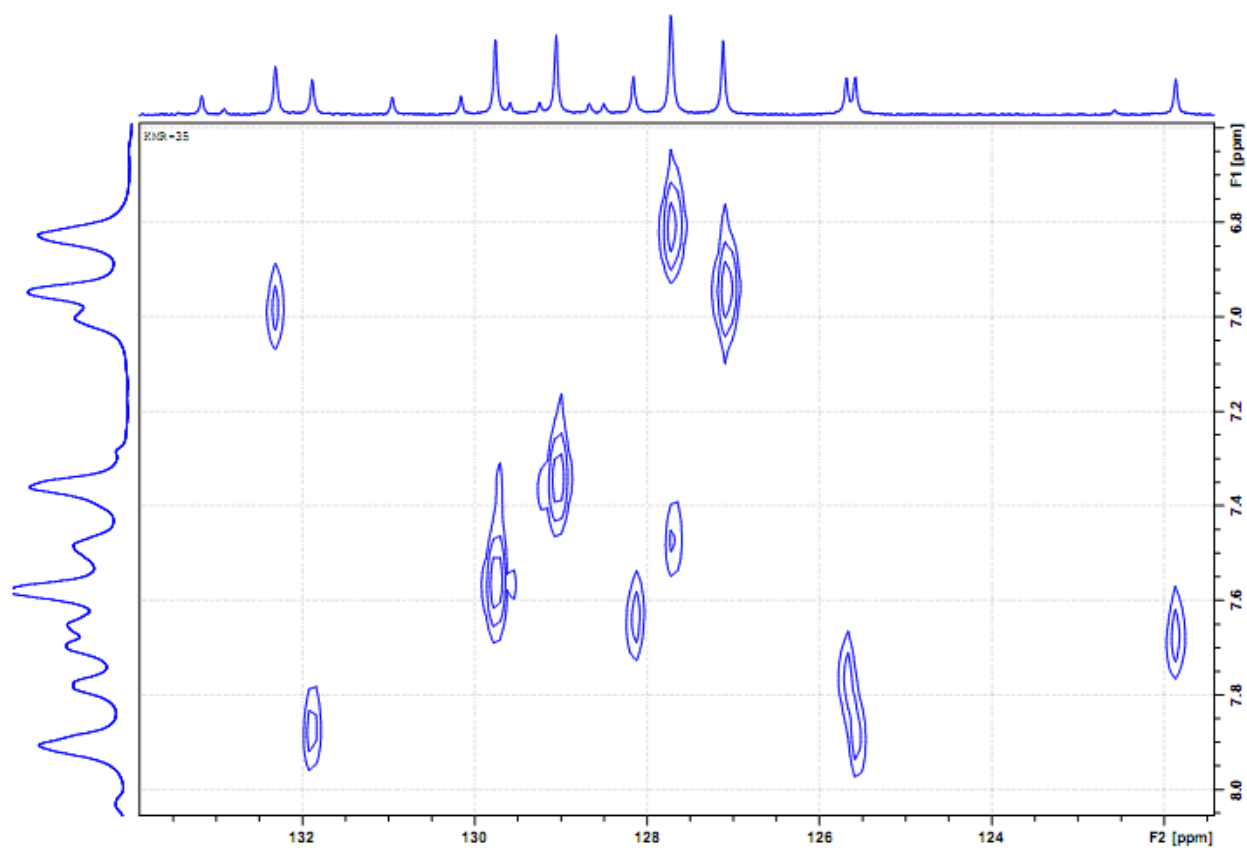

Expanded  $^1\text{H}$ - $^{13}\text{C}$  COSY spectrum of compound 10d

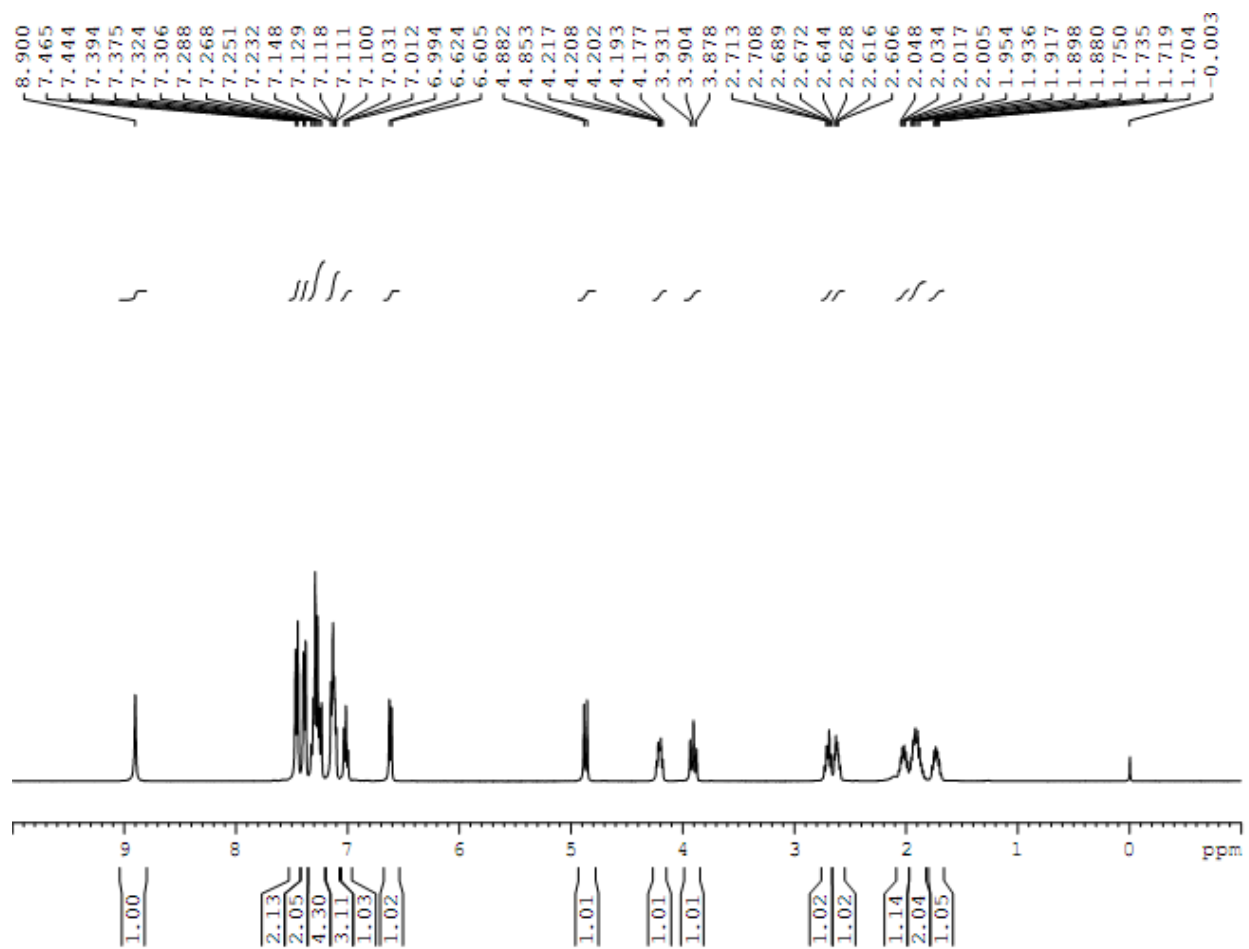

<sup>1</sup>H NMR Spectrum of **6B**

(Spiropyrrrolizidine from Isatin, D-Proline and 4-chlorobenzylidene acetophenone)

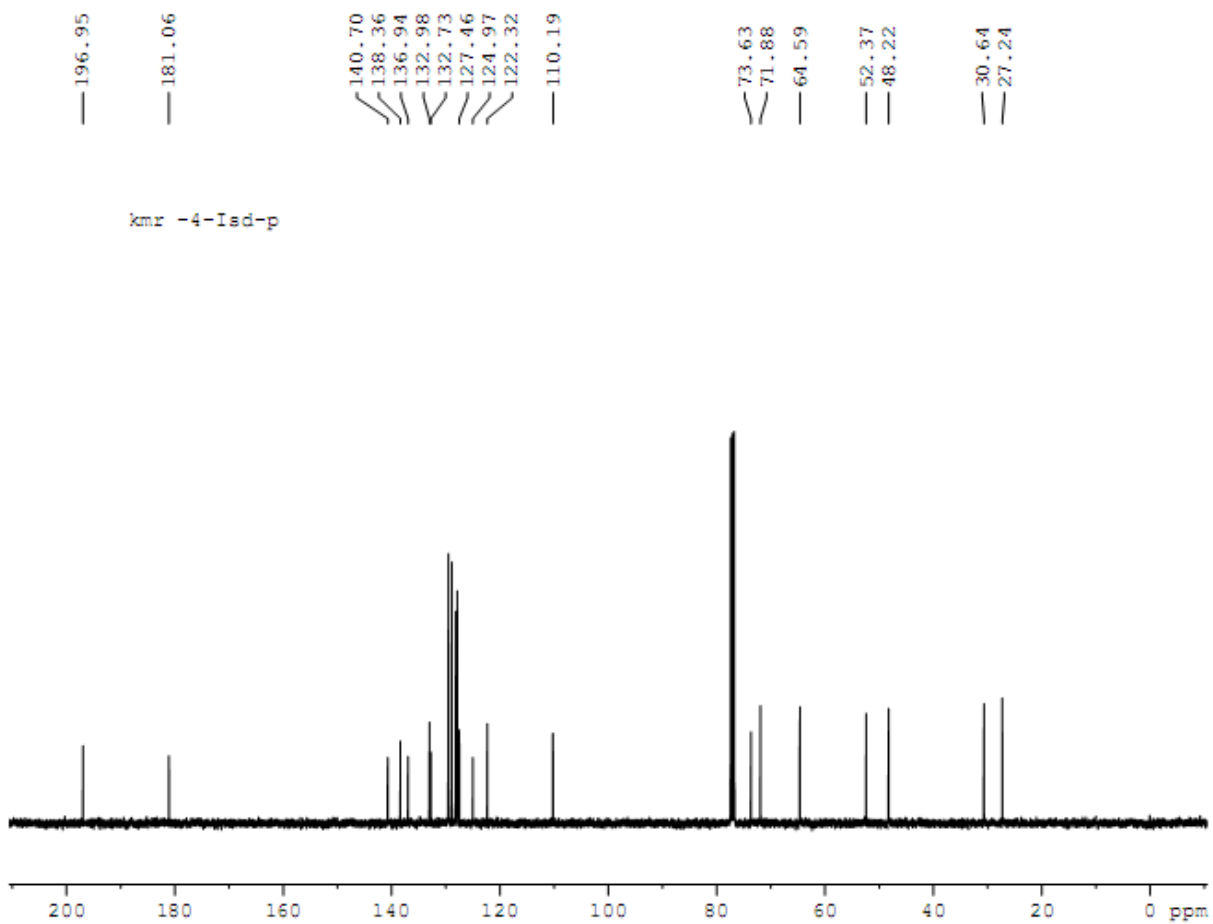

$^{13}\text{C}$  NMR Spectrum of **6B**

(Spiropyrrolizidine from Isatin, D-Proline and 4-chlorobenzylidene acetophenone)

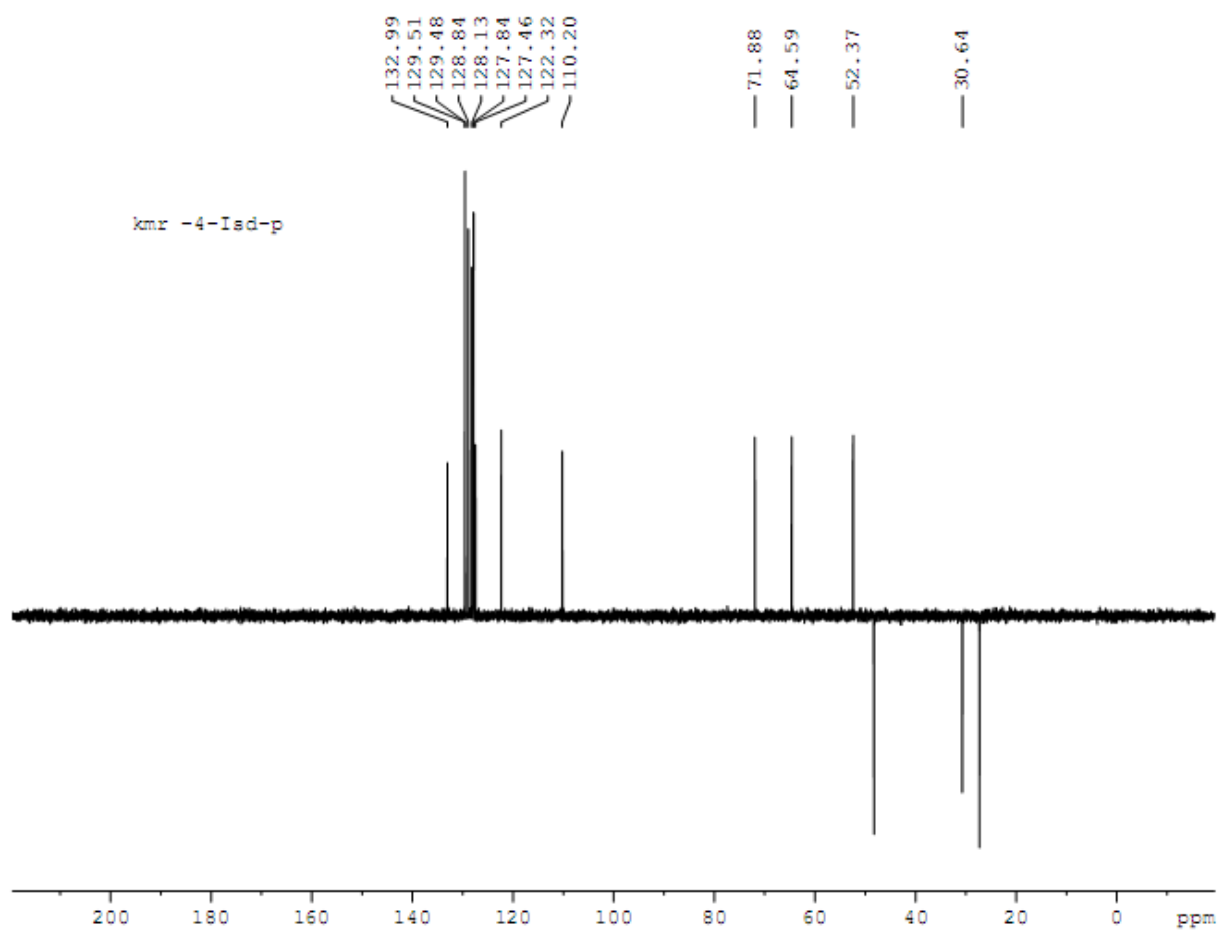

DEPT  $^{13}\text{C}$  NMR Spectrum of **6B**

(Spiropyrrolizidine from Isatin, D-Proline and 4-chlorobenzylidene acetophenone)

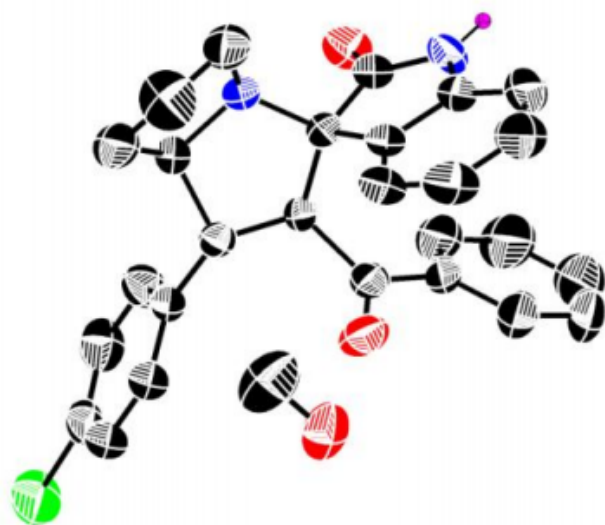

ORTEP representation of the crystal structure of compound **6b**. Thermal ellipsoids are drawn at 50% probability and all H atoms are removed for clarity

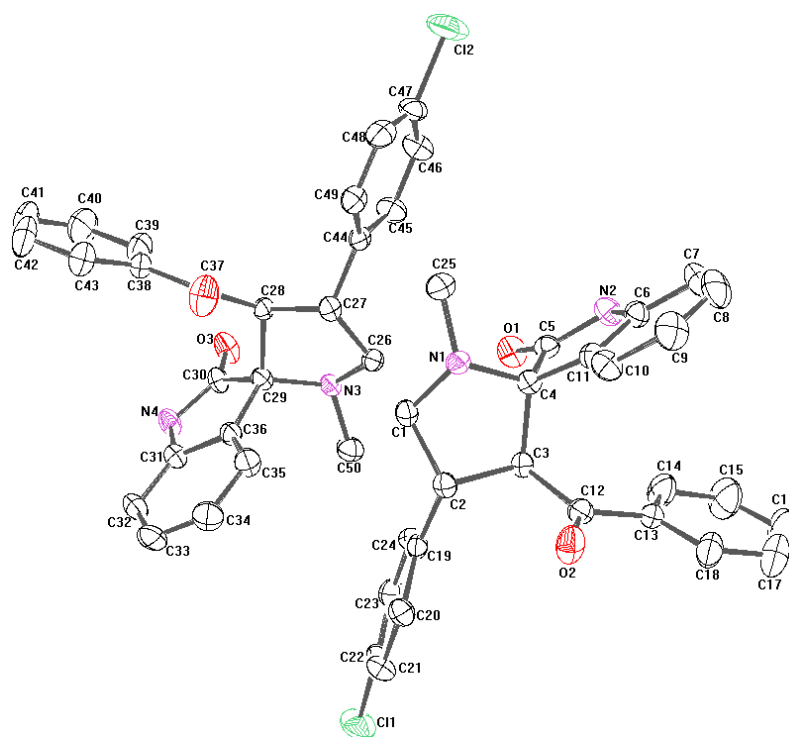

ORTEP representation of the crystal structure of compound **6n**. Thermal ellipsoids are drawn at 30% probability and all H atoms are removed for clarity
